# Supplementary material
Source: PubMed Central journal article supplement (PMC4260775)
Supplement: NIHMS634419-supplement-3.pdf [file NIHMS634419-supplement-3.pdf]

**Supplementary Table 1. The exon nomenclature of *Ank2* used in this study.**

The exon information was collected from a previous study (Cunha, *et al.*, *J Mol Cell Cardiol* **45**, 724–734, 2008) and the current information in the Ensembl database. The coordinates of each exon in chromosome 3 are shown (GRCm38/mm10). Except for the alternative first exons, all other known alternative exons are highlighted in yellow. Exons 2' and 3' are incorporated when exon 1' is used. In this situation, exon 3' is an alternative exon. When exon 1s is used, the predicted start codon is highlighted in red in exon 24. When exon 51 is included, the alternative stop codon is highlighted in red in exon 52.

| Exon No. |                                    | Start       | End         | Start Phase | End Phase | Length | Sequence                                                                                                                                                                                                                                                                                                                                                                                                                                                                                                                                                                                                                                                                                                                |
|----------|------------------------------------|-------------|-------------|-------------|-----------|--------|-------------------------------------------------------------------------------------------------------------------------------------------------------------------------------------------------------------------------------------------------------------------------------------------------------------------------------------------------------------------------------------------------------------------------------------------------------------------------------------------------------------------------------------------------------------------------------------------------------------------------------------------------------------------------------------------------------------------------|
| 1"       | <a href="#">ENSMUSE00001205851</a> | 127,499,115 | 127,498,668 | -           | 0         | 448    | GAGCTCCGGCAGGCAGTGGTGCATATAGACATATTTCTGGGAGCTGTC<br>CATGAGCTCATCGCTCTCCCGGCGCGGGCGAAGGAAGAAGCCCTCCT<br>CTTTCTCCCGCGCCACCAGCAGCAGTTCGCTTAGCGCTTGTGCGCGGC<br>CCAGCCCGCAGCCACTCGGCGCACCATGGCCCCACGGCACCTCGCGC<br>AGAGGTAGGTGGGCTCGGGCAGCAGGTCTCCACGGGCGATCGCGGCCA<br>AGGCCGACCTTTCGCGGTGCGCTAGAAGCACGCGGGTCCCGGGGTGAG<br>CCCGAACGCGCAGGCCGGGAGCGGAAGAGACGAGGACACGCGGGACA<br>GCCGGACTTGACCGAGGGAAGGAGTTCGAGAGCGTGGACATGCTTC<br>TCCCACCTCCCTGGCCCCGAGGGAGGGCCTGCACCCCGCAGAACCC<br>CCCGCGGATCCGTCAG                                                                                                                                                                                                                           |
| 1'       | <a href="#">ENSMUSE00001252380</a> | 127,409,058 | 127,408,845 | -           | -         | 214    | GTCAGAGCAGATCATGTGGTGTCTGTAGGCAGCTGGGACTGGCCCCG<br>GGGAAGCACATGGATTACAGTCTGAGGCTGTGATGGGAAAGTCGGTTC<br>CTGGGCTGCTGTCTCATACATCAGCAGGCAGGGAAGCTGGGGACTC<br>CGACTCGCCCTTCTCCGGGCCCTCCTGCTGCGTGGTACAGGCAATC<br>GCTGAGAGAAGCTGCTGCTCCA                                                                                                                                                                                                                                                                                                                                                                                                                                                                                       |
| 2'       | <a href="#">ENSMUSE00001226003</a> | 127,339,192 | 127,339,132 | -           | 0         | 61     | GTAAGTAACTGATCAGGGACATGAAGAACTGCTATTTCAAATGACAAC<br>CATGTTGCAAAAG                                                                                                                                                                                                                                                                                                                                                                                                                                                                                                                                                                                                                                                       |
| 3'       | <a href="#">ENSMUSE00001237108</a> | 127,248,232 | 127,248,134 | 0           | 0         | 99     | AGCCAAAACAAGTGTGAGAGCCAACTACATGCAATGAAGTCACACAA<br>TCAAGCTGCATCCAACGCAAGGACCCCAATGGTGTGCATCCCGATGAC<br>CAG                                                                                                                                                                                                                                                                                                                                                                                                                                                                                                                                                                                                              |
| 1        | <a href="#">ENSMUSE00001216415</a> | 127,225,932 | 127,225,764 | -           | 0         | 169    | GTCTCTTGTAAAGTGCACGCACGCCAGTGGTCTGTTCCCGCGGCCGGT<br>TTGATGGCACAGCTATTTTCTTCCAAACTGTTCAAATGATGAACGA<br>AGATGCAGCTCAGAAAAGCGACAGTGGAGAGAAGTTAATGGCAGTAG<br>TCAAAGAAGAAAAGACCCAAGAAG                                                                                                                                                                                                                                                                                                                                                                                                                                                                                                                                       |
| '1       | <a href="#">ENSMUSE00001257111</a> | 127,162,342 | 127,161,679 | -           | 0         | 664    | TTTTCTCTCGCCCTGCATAGAGGTGTGGTTGCAAGCGGCAGAGAACTC<br>CCCACCCCTTAGGACTTTACCGAGGTGGCCTCTTCTGGCTCCGG<br>TCTGAAGACAGACTGTCTGGAGGAGTCCCCAAGACCGTTCCAATGG<br>TGATGAGCGCCTAAGGAAGGCTTCTGCAACTATTAGGATGCTTGTCTG<br>CACTCGGGGCCACCAACTGCTGAGGAGCTCCGGTCCAGAGCTCCGC<br>CCTCCCCGGGACCATTGCTGAGCGTGGGCGCTCACCTGTGCATGCCT<br>GTGTGCAGGTGTGGGCTGCTCAGGGGCTCGGCTCGCAACCTAGGGGGA<br>CGCTCGAGTGAATTATGGGTGCTGCAGAGGCTGGAGCAAGATTATGAC<br>CTAGCTCGGGGCGGAGTGGATTATTTTGTGAGTGTCTGTCTGCCAG<br>CCATTGCTCTGCTGGGGGAAAAATCACATCTCCACATAGCAGTCAA<br>TCACCTGTATTGCTGGGGAGTGGAAAGTTATCCTCTGCCGATTTCTGC<br>TGCCAAAATGCTCACGCTGCTTCTATCAAAAAGTTAGAGAGGC<br>TGAAGTGGATGAAAAGGAAAAAATCTGGACAGAGAGAAAAAACA<br>ACGGAAAATCCCCAGGGATCGGATGGAGCGGAAAAGAAAAG |
| 2        | <a href="#">ENSMUSE00001276722</a> | 127,104,862 | 127,104,761 | 0           | 0         | 102    | TCTGACAGCAATGCCAGTTCCTCCGCGCTGCCAGAGCAGGCAACCTG<br>GACAAAGTGGTGAATATCTGAAAGGGGGCATTGACATCAATACCTGC<br>AATCAG                                                                                                                                                                                                                                                                                                                                                                                                                                                                                                                                                                                                            |
| 3        | <a href="#">ENSMUSE00001294343</a> | 127,096,897 | 127,096,802 | 0           | 0         | 96     | CAATGGAAGAGTAACCGATCCATGTGGACCAAGGAAACGAAGAGTCAG<br>CTGGACGTGATAGTGCACGCCTTTAATCTCAGCATTGGGAGACAGAG<br>AATGGACTCAATGCTCTCCACCTGGCAGCCAAGGAAGGCCATGTGGGC<br>CTTGTGCAGGAGCTGCTGGGAAGAGGGTCTCCGTGGATTCTGCCACC<br>AAG                                                                                                                                                                                                                                                                                                                                                                                                                                                                                                       |
| 4        | <a href="#">ENSMUSE00001224175</a> | 127,079,996 | 127,079,898 | 0           | 0         | 99     | AAGGGAAATACCGCCCTTACATTGCATCACTGGCTGGACAAGCAGAA<br>GTTGTCAAAGTCTAGTTAAGGAAGGAGCCAATATCAATGCCAGTCG<br>CAG                                                                                                                                                                                                                                                                                                                                                                                                                                                                                                                                                                                                                |
| 6        | <a href="#">ENSMUSE00001288369</a> | 127,057,091 | 127,056,993 | 0           | 0         | 99     | AATGGCTTCACTCCTTTGTACATGGCTGCCAGGAGAATCACATTGAT<br>GTTGTAATAATTTGCTAGAAAATGGAGCTAACCCAGAGTACTGCTACA<br>GAG                                                                                                                                                                                                                                                                                                                                                                                                                                                                                                                                                                                                              |
| 7        | <a href="#">ENSMUSE00001297331</a> | 127,052,873 | 127,052,688 | 0           | 0         | 186    | GACGGCTTTACTCCTCTGGCTGTGGCACTCCAACAGGGACACAACCAG<br>GCGGTGGCCATCCTCTTGGAGAATGACACCAAAGGAAAGGTGAGGCTA<br>CCAGCCCTGCACATTGCTGCTCGGAAAGATGACACCAAGTCCGCCGCC<br>CTCCTGCTTCAGAATGATCACAACGCTGATGTACAATCCAAG                                                                                                                                                                                                                                                                                                                                                                                                                                                                                                                  |
| 8        | <a href="#">ENSMUSE00001306055</a> | 127,052,249 | 127,052,226 | 0           | 0         | 24     | ATGATGGTGAACAGGACAACAGAG                                                                                                                                                                                                                                                                                                                                                                                                                                                                                                                                                                                                                                                                                                |
| 9        | <a href="#">ENSMUSE00001295005</a> | 127,048,280 | 127,048,182 | 0           | 0         | 99     | AGTGGCTTCACTCCTTTGCACATAGCTGCACACTATGGGAATGTAAAT<br>GTGGCAACTCTTCTTAAACCGGGGAGCTGCTGTGGACTTACCAGCC<br>AGG                                                                                                                                                                                                                                                                                                                                                                                                                                                                                                                                                                                                               |
| 10       | <a href="#">ENSMUSE00001220180</a> | 127,046,823 | 127,046,725 | 0           | 0         | 99     | AATGGAATCACTCCTCTGCACGTGGCTTCCAAACGAGGAAATACCAAC<br>ATGGTGAAGCTTCTACTGGATCGAGGTGGTTCAGATTGATGCCAAACT<br>AGG                                                                                                                                                                                                                                                                                                                                                                                                                                                                                                                                                                                                             |
| 11       | <a href="#">ENSMUSE00001234638</a> | 127,038,845 | 127,038,747 | 0           | 0         | 99     | GACGGCTGACACCACTTCACTGTGCTGCGCGGAGTGGGCATGATCAA<br>GTGGTGGAGCTGCTGTTGGAACGGAAGGCTCCCTGCTGGCGAGGACC<br>AAG                                                                                                                                                                                                                                                                                                                                                                                                                                                                                                                                                                                                               |
| 12       | <a href="#">ENSMUSE00001252274</a> | 127,032,313 | 127,032,116 | 0           | 0         | 198    | AATGGGCTGTCCCGCTTACATGGCTGCGCAGGGGGACCACGTGGAA<br>TGTGTGAAGCACCTGCTCCAATACAAGGCGCTGTCGATGACGTCACC<br>CTGGATTACCTGACGGCTTTCATGTTGCTGCACACTGTGGGCACTAC<br>CGTGTAAACCAACTCCTGCTGGACAAGAGAGCCAACCCGAACGCAAGA<br>GCCCTG                                                                                                                                                                                                                                                                                                                                                                                                                                                                                                      |
| 13       | <a href="#">ENSMUSE00001235227</a> | 127,029,573 | 127,029,475 | 0           | 0         | 99     | AATGGTTTTACTCCACTGCACATTGCCTGCAAGAAAAACCGCATCAA<br>GTCATGGAAGTGTGGTGAATATGGGGCTTCAATCCAAGCTATAACA<br>GAG                                                                                                                                                                                                                                                                                                                                                                                                                                                                                                                                                                                                                |
| 14       | <a href="#">ENSMUSE00001267026</a> | 127,029,317 | 127,029,219 | 0           | 0         | 99     | TCTGGCTCACACCAATACATGTGGCTGCCTTTCATGGGCACTTGAAC<br>ATTGTCCCTCTTCTGCTGCAGAACGGAGCTTCCAGATGCTACTAAC<br>ATT                                                                                                                                                                                                                                                                                                                                                                                                                                                                                                                                                                                                                |
| 15       | <a href="#">ENSMUSE00001300397</a> | 127,023,390 | 127,023,292 | 0           | 0         | 99     | CGTGGTGAGACAGCTTTCACATGGCGGCCCGGGCTGGGCAGGTGGAA<br>GTGGTCCGATGCTTCTGAGGAATGGTGTCTTGTGGATGCCAGAGCC<br>AGG                                                                                                                                                                                                                                                                                                                                                                                                                                                                                                                                                                                                                |
| 16       | <a href="#">ENSMUSE00001255725</a> | 127,017,013 | 127,016,816 | 0           | 0         | 198    | GAGGAGCAGACACCTTTACACATTGCCTCCAGGCTGGGGAAGACGGAA<br>ATTGTCCAGCTGCTTCTACAGCATATGGCTCACCCCGATGCAGCCACT<br>ACAAATGGGTACACACCACTACACATCTCTGCTCGGGAAGGACAGGTA<br>GACGTGGCTCTGTCTGCTGGAAGCGGGAGCAGCCATTCTTAGCG<br>ACCAAG                                                                                                                                                                                                                                                                                                                                                                                                                                                                                                      |

|     |                                    |             |             |   |   |      |                                                                                                                                                                                                                                                                                                                                                                                                                                                    |
|-----|------------------------------------|-------------|-------------|---|---|------|----------------------------------------------------------------------------------------------------------------------------------------------------------------------------------------------------------------------------------------------------------------------------------------------------------------------------------------------------------------------------------------------------------------------------------------------------|
| 17  | <a href="#">ENSMUSE00001261152</a> | 127,013,337 | 127,013,239 | 0 | 0 | 99   | AAGGGCTTCACTCCCCTGCATGTAGCAGCCAAGTATGGAAGCCTGGATGTGGCAAACCTTCTCTTGCAACGTCGTGCAGCCGAGATTCAGCAGGG AAG                                                                                                                                                                                                                                                                                                                                                |
| 18  | <a href="#">ENSMUSE00001233123</a> | 127,012,771 | 127,012,673 | 0 | 0 | 99   | AATGGCCTTACCCCGCTCCATGTTGCTGCTCATTATGACAACCAGAAGGTGGCGCTGTTGCTGCTGGAGAAGGGTGCTTCCCCTCATGCCACGGCC AAG                                                                                                                                                                                                                                                                                                                                               |
| 19  | <a href="#">ENSMUSE00001263191</a> | 127,011,051 | 127,010,854 | 0 | 0 | 198  | AATGGCTATACTCCCTTACACATTGCTGCCAAGAAGAATCAGATGCAG ATAGCTTCCACACTACTGAACTATGGGGCCGAGACTAACACTGTGACA AAGCAAGGGGTCACTCCACTGCATCTGGCCTCACAAGAGGGGCACACA GACATGGTCACCTTGTCTTGACAAAGGAGCCAATATCCACATGTCA ACCAAG                                                                                                                                                                                                                                           |
| 20  | <a href="#">ENSMUSE00001253269</a> | 127,004,043 | 127,003,945 | 0 | 0 | 99   | AGTGGACTCACATCCTTACACCTTGCAGCCCAAGAAGATAAGGTGAAC GTTGCAGGACATTTCTACCAAACACGGGGCCGATCGGGATGCCTACACA AAG                                                                                                                                                                                                                                                                                                                                             |
| 21  | <a href="#">ENSMUSE00001233506</a> | 127,002,776 | 127,002,678 | 0 | 0 | 99   | CTTGGTTACACACCTTTGATCGTGGCCTGTCACTATGGAAATGTGAAA ATGGTCAACTTTCTTCTGAAACAGGGAGCAAATGTCAATGCGAAAACC AAG                                                                                                                                                                                                                                                                                                                                              |
| 22  | <a href="#">ENSMUSE00001232182</a> | 126,998,975 | 126,998,877 | 0 | 0 | 99   | AATGGCTACACACCTTTGCACCAAGCTGCCAGCAGGGCCACACACAC ATCATTAATGTCTGCTCCAGCACGGGGCCAAGCCTAATGCTACTACT GCG                                                                                                                                                                                                                                                                                                                                                |
| 1s  | <a href="#">ENSMUSE00000669796</a> | 126,998,461 | 126,998,324 | - | - | 138  | AGTGTCTGGGCTGGATGCAGCCAGAATTGCTAGCTTGTATAGTTTGT GCAGCACTGGAGATCCTGCAGCGCAGAAGCTAAATCTGTCACTGGGTC CCTATGGTAACATCTTACCTGCAGCAGATGGCCTGACTCTTG                                                                                                                                                                                                                                                                                                        |
| 23  | <a href="#">ENSMUSE00001307115</a> | 126,997,951 | 126,997,853 | 0 | 0 | 99   | AATGGTAACACGGCCCTGGCGATTGCTAAGCGCTGGGCTACATCTCC GTGGTTGACACCCTGAAGGTTGTGACTGAAGAGGTCACCACCCTACC ACG                                                                                                                                                                                                                                                                                                                                                |
| 24  | <a href="#">ENSMUSE00001285026</a> | 126,988,216 | 126,988,144 | 0 | 1 | 73   | ACTATCACGAAAAACATAAGCTAAATGTTCTGAGACAATGACGGAG GTCTTGTATGTTTCTGATGAAGAGG                                                                                                                                                                                                                                                                                                                                                                           |
| 25  | n/a                                | 126,986,638 | 126,986,585 | 1 | 1 | 54   | CCCTTAAGCAGTTTGGTGACCCTTTATTGATGGGAAGCATTTAGTG ACTCAG                                                                                                                                                                                                                                                                                                                                                                                              |
| 26  | <a href="#">ENSMUSE00001275399</a> | 126,981,944 | 126,981,800 | 1 | 2 | 145  | GTGATGACACTGTGACAGGTGATGGGGGAGAATACCTCAGGCCAGAAG ATCTCAAGGAGCTCGGAGATGACTCACTGCCAGCAGTCAGTTCTGG ATGGCATGAACTACCTTCGGTACAGTCTGGAGGGAGGAAGATCCGACA G                                                                                                                                                                                                                                                                                                 |
| 27a | <a href="#">ENSMUSE00001274268</a> | 126,976,947 | 126,976,845 | 2 | 0 | 103  | CCTCCGTCCTTCAGTTCGACAGGTCTCACACTCTGAGCCATGCATC GTACCTGAGGGACAGTGCCATGATTGACGACACGGTTGTGATCCCCAG CCACCAG                                                                                                                                                                                                                                                                                                                                            |
| 27b | n/a                                | 126,976,932 |             |   |   | 88   |                                                                                                                                                                                                                                                                                                                                                                                                                                                    |
| 28  | <a href="#">ENSMUSE00001304535</a> | 126,976,154 | 126,976,051 | 0 | 2 | 104  | GTGCTGCGCTAGCCAAGGAGGCAGAAAGGAATTCCTTATCGTCTGAGC TGGGGCACTGAGAACCTTAGACAACGTGGCTCTTCTTCCAGTCTTATT CATTGAGG                                                                                                                                                                                                                                                                                                                                         |
| 29  | <a href="#">ENSMUSE00001285906</a> | 126,971,038 | 126,971,003 | 2 | 2 | 36   | CCGCTCCTCTCCATGTCTCGATCGTGACAACAGCAG                                                                                                                                                                                                                                                                                                                                                                                                               |
| 30  | <a href="#">ENSMUSE00001288521</a> | 126,965,162 | 126,964,938 | 2 | 2 | 225  | TTTCTAGTCAGTTTTATGGTGGATGCCCGTGGTGGTGCATGCGAGG ATGCAGACACAATGGACTCAGAATCATTATCCACCTCGGAAATGCAC AGCCCCAACTCGCGTCACCTGCCGCTTGTGAAACGCCATCGACTGGC AACAAATGCCGCCCATGGTGGAAAGGAGAAGGCCTGGCCAGCCGCTGAT TGAAGTCGGACCTTCGGGAGCTCAGTTTCTTGG                                                                                                                                                                                                                 |
| 31  | <a href="#">ENSMUSE00001222661</a> | 126,963,481 | 126,963,383 | 2 | 2 | 99   | TAAACTTCACCTGCCAACGGCTCCTCCCCACTTAATGAGGGAGAAAG TTTGGTCAAGCCGATCCTTCAGCTGGGGCCTCTGGAACCAAATTCCT TGG                                                                                                                                                                                                                                                                                                                                                |
| 32  | <a href="#">ENSMUSE00001233359</a> | 126,962,405 | 126,962,251 | 2 | 1 | 155  | GCCCGTGATCGTGGAGATCCCTCACTTCGCGCTCTTCGAGGAAAGGA GAGGGAGCTGGTGGTCTGCGCAGTGAATAAGGGACAGCTGGAAGA GCATTTCTGCGACTACACTGAGGATGAATTGAACGAAATCCTTAATGG CATGGATGAAG                                                                                                                                                                                                                                                                                         |
| 33  | <a href="#">ENSMUSE00001268007</a> | 126,959,864 | 126,959,653 | 1 | 0 | 212  | TGCTGGACAGTCCAGAAGACCTGGAAAAGAAACGAATCTGCCGCATCA TCACTCGTGACTTCCCACAGTACTTTGCGGTGGTGTCTCGCATCAAAC AGGACAGCAACCTGATTGGCCCCGAGGGTGGAGTACTGAGCAGCACAG TGGTGTACAGGTGCAAGCCGTCTTCCAGAGGGCGCACTACCAAGC GCATTCGAGTAGGCCTACAG                                                                                                                                                                                                                              |
| 34  | <a href="#">ENSMUSE00001227835</a> | 126,959,087 | 126,958,883 | 0 | 1 | 205  | GCTCAACCTATGCATAGTGAATTGGTAAAGAAGATCTTAGGCAACAAA GCCACCTTCAGCCCAATAGTCACTTTGGAACCCAGGAGAAGAAATTC CACAAGCCAATTACTATGACTATTCCTGTCCCCAAAGCTTCAAGTGAT GTCATGCTGAATGGTTTTGGGGGAGACGCACCAACCTTAAGATTACTG TGCAGCATAACAG                                                                                                                                                                                                                                   |
| 35  | <a href="#">ENSMUSE00001297707</a> | 126,957,352 | 126,957,256 | 1 | 2 | 97   | GTGGAACCTACGCCTGCCAGTGGGAAGACATCACAGGAACAACGCCAC TAACATTTGTCAATGAGTGTGTTTCTTTACAACCAACGTGTCTGCCA G                                                                                                                                                                                                                                                                                                                                                 |
| 36  | <a href="#">ENSMUSE00001287914</a> | 126,956,098 | 126,955,870 | 2 | 0 | 229  | GTTCTGGCTGATAGACTGTGACAGATTCAGGAGTCTGTTGCCTTTGC ATCACAAGTGTATAGAGAAATATCTGTGTGCCATATATGGCCAAATT TGATGTTTGGCAAGTACATGACCCCATGAAAGCCAGGTTGCGGTG TTTCTGTATGACAGATGACAAAGTAGATAAGACCCTTGAACAACAAGA AAACCTTCTGAGGTGGCCAGGAGCAGGGATGTGGAG                                                                                                                                                                                                                |
| 37  | <a href="#">ENSMUSE00001233894</a> | 126,955,109 | 126,954,984 | 0 | 0 | 126  | GTATTGGAAGGAAAACCTATTTATGTTGATTGTTTGGCAACCTGGTT CCACTAACCAAGAGTGGCCAAACATCATATATTCAGCTTTTTTGCCTTC AAAGAAAATAGACTTCTCTCTTTGTCAAG                                                                                                                                                                                                                                                                                                                    |
| 38  | <a href="#">ENSMUSE00001249776</a> | 126,953,299 | 126,953,177 | 0 | 0 | 123  | GTTCTGTGACACAACCCAGGAACCTTGCAGGGGACTCTCATTATGAAG GAACCCAAATCCACAAGAGGACTGGTGCATCAAGCTATTTGCAACTTA AACATCACCTTGCCAATTTATGCCAAG                                                                                                                                                                                                                                                                                                                      |
| 39  | <a href="#">ENSMUSE00001281374</a> | 126,952,521 | 126,952,489 | 0 | 0 | 33   | GAATCGGAGTCAGATCAAGAGCCGGAGGAAGAG                                                                                                                                                                                                                                                                                                                                                                                                                  |
| 40  | <a href="#">ENSMUSE00000669794</a> | 126,950,756 | 126,950,735 | 0 | 1 | 22   | ATCGGTATGACATCCGAAAAA                                                                                                                                                                                                                                                                                                                                                                                                                              |
| 41  | <a href="#">ENSMUSE00001250226</a> | 126,947,807 | 126,941,610 | 1 | 1 | 6198 | ATGATGAGACAGAGTCGACAGAAACATCTGTCTGAAAAGCCACCTGG TTAATGAAGTTCTGTCTTAGCAAGTCCGGACTTGCTCTCTGAAGTTT CTGAGATGAAACAAGATTTGATCAAAATGACGGCCATCTTGACCACAG ATGTGTCTGATAAGGCAGGTTTCGCTCAAAGTGAAGGAGCTGGCAAAGG CCGGTGAAGAAGAGCCAGGCGAGCCCTTTGAAATTTGATAGAGAGTGA AGGAGGACTTAGAGAAGGTGAATGCGATCTGAGGAGTGAACATGCA TGAGAGATGAAGGCAGAGCGGAGTTCTCAGTCTGAGCGGGAGCTAG AGGAGGAATGGGTTATTGTGACGATGAGGAAATCCAAGAGGCCAAGC AACACGCCCCAGTAGAAATCGATGAACACCCATGTATAGAGGTCAGAG |

TAGACAGAGAGACCAAGGCCAAAGTAGAAAAGGACTCTACTGGGTTAG  
TGAACCTACCTCACAGATGACCTAAATTCATACACTAGTCCTCATGAAA  
AGAAGCCACACACAGCTCCAGAAAAGTCAGGGGAGACAAGTCAGGCTT  
CAGCTGTTGGCAAGAGCTCTGAGAGTAATAAGGGGAAGGCCACCTCAG  
CCGAGGAGAAAACAGAGCGCTCAGAAGCAGCTCAAACCAGGCTGGCGA  
TCAAAAAGCCAGTGAGGAGGAACTAAAAGAGAAGCAGAAAACAGAAAG  
AGGAAAAGCTCGCAAAGCAGCGAAGAAAAGACCGAACCTAAGAAAGGTA  
GTTTACAGAGGAGTCGGTAGATGAAGACCGCGCCTGGTCCCTGAACCCC  
TCCCCACTGCCAAGGCCACCTCTCCTCTCATAGAAGAACTCCTATTG  
GTTCCATAAAGGACAAAGTGAAGGCTCTTCAGAAGCGAGTGGAAGATG  
AGCAGAAAAGGCCGAAGCAAGCTGCCAGTCAGAGTCAAAGGCAAAGAGG  
ATGTGCCAAAAGGACCCTCCAGGACACACCAGCTGTGTACCCTT  
CTTCAAAGTCATCGACTTCTCTAAAGCAGAAAAGACACTCTTCCCTTT  
CTTCTCCGAAAACCTGAAAGGCACACACCAGTGTACCCTCCAGCA  
AAAACGAAAACCTCTCACCTGTGTACCCTCGGCCAAAACCGAACGGC  
ATTCACCAGTATTTTCAGGTAACCCGAGAAAACACTCACCTGGTTCCC  
CCTCAACCAAAAATGAAAGACATTCCCCTGTGTCTCTTAAAACAG  
AACGACACACACCCGGGTCCCCTTCAGGTAAGACAGACAAACGTCCAC  
CGGTGCCATCATCTGGAAGAACAGAGAAAACATCCCCAGTGTACCCTG  
GCAAAAACGAAAACACTTGGCCCGGTTCCCCTTCTATAAGAACCCAG  
AGAAGCCGGCACCTGGGTCTGCCACCGGGAAAACATGAGAAGCACCTCC  
CTGTGTCTCCTGGGAAGACAGAAAAGCAGCCACCCATATCTCCACCT  
CCAAAACCGAACGAATTGAGGAGACAATGTCTGTCCGGGAGCTCATGA  
AAGCATTCAGTCAGGTCAGGACCCATCTAAAACAAAACAGGACTCT  
TTGAGCACAAGTCAGCCAAAACAAAACAGCCGCAAGACAAAAGTAAAA  
GTCGGGTAGAAAAGAAAAGGGCACACTGTGACCCAGAGAGAAAACAC  
AGAGAAATAGAAAGTCAGACAGCCAAGCGTGGCCAGAGATTCCAGGTCT  
CGGCAGCTACGGAATCCAGAAGGTTCCGTTCTACCACCATCACCGTTG  
GGCTCAGGATGGAAGATCCAGTTAGAGAAAAGGTTTGGAGAAACCCCA  
TTATTAACACACCCGAGGTAGTTCCATCAGTGGCGGCAGAAGAGAGCC  
ATCGTGGGAGTGAGAAGATTGTGGATGAGCAGGGAGACATGGACTTCC  
AGATCAGTCCAGACAGGAAAACCTCCACTGACTTTTCTGACTCATCA  
AGCAAGAGTTAGAAGACAATGACAAAATACCAACAATTCGCTCACCG  
AGGACACAGAAAAGGCTCAGGTTTATTTAGACAAAGTAAATTACGAGTC  
CCTTCAACACGGCTTTCCACTAGATTATATGAAAGACGAGTTCCTTC  
CAGCTCTGTCTTTACAGAGCGGTGCTTTGGGTGGCAGTTCGAAAGCC  
TGAAACAAGAAGTGATAGCAGGCTCGCCTTGCAGCAGCCTGATGGAAG  
GCACGCCTCAGATCAGTTCAGAAGAGAGCTACAAAACATGAGGGCCTAG  
CAGAAACTCCTGAGACAAGTCCAGAGAGTCTTTCTTTCTCACCAAAGA  
AAAAGTGAGGAACAGATTGGAGAGGCTAAGGAAAACCTCAAGGTAGGAA  
CACCCACAGACATTCATTCAGAAAAGAGCTTCTATAACTAATGACA  
TTACTGATAGTTCTCAAAAACAAGGTGCTGGGGTCACTCGGGGTTTCCAG  
AGCCCTCTACAGAGCATTCTCAGAAGGAGGTACCCCAAGACCCCTCACA  
AAGATGTGTGCTCCAAACAAGATGGCTGCCCTGAGAGCCAGAGTGTAT  
CATTAGCAAGTGAGGTGTTTACTGAGAAAAGGGTCTGTGGTGAAGTC  
AGCTTCCACTTGTAGCTCAGCTTTTAAAGACACAATCAGAAAGTGAAA  
CTCAGGAATCCTTAACACCCCTCAGAAGTGACAAAAGCCCTTCCCACCAT  
CTGATGCTTCCGTCAAGACAGCTGAGGGAACCTGAACCAAAGCCCCAGG  
GAGCTATTAGAAGTCCCCAAGGGCTAGAACTTCTCTCCCTAACCGGG  
ATAGTGAGGTCTTAGCCCAATGGCTGATGAATCATTAGCAGTCAGCC  
ACAAAGACTCTCTGGAAGCCAGCCCCGTGCTAGAAGATAACTCCTCCC  
ACAAAACCCCTGATTCTCTGGAACCAAGTCTCTGAAAGAGTCCCCTT  
GCAGGGACTCCCTTGAAGCAGCCCCGGTTGAGCCTAAAATGAAGGCAG  
GAATACTCCCAAGTCACTTTCCCCTCCCCGAGCTATTGCCAAAACAG  
ATCTTGTGCGGAAGTGGCCTCCATGCGTTCCCGGTGCTCCGAGACC  
CCGATGGCAGTGCTGAGGATGACAGTCTAGAGCAGACATCCCTCATGG  
AGAGCTCAGGGAAAAGCCCCCTGTCCCCTGACACCCCCAGCTCCGAGG  
AAGTTAGCTACGAGGTACACCCAAACCTTCCGATTCAAGTACACCCA  
AACC GGCTGTGATTACGAATGTGCAGAAGAGGATGACTCTGAGAACG  
GGGAGAAGAAGAGGTTACGCCAGAAGAGGAAAATGTTCAAAATGGTAA  
CCAAAATTAACAGTTTGGATGAACTTGAGCAAGAAGCAAAGCAGAAAA  
GGGACTACAAAAAGAACCAGGCAAGATGGGTCTCCTCAGCCTCGG  
ACCCCGATGCTGACTATTACAGCAGAAGTGAATGACGAGAAAACAGATGG  
CGGGCACAGAGGGGGAGGGGGAGGTCCCTGTCTTGGTGACTTCAGAGA  
ACAGAAAAGGTTTCTTCTTCTCCTCGGAGAGCGAACCTGAGCTGACAC  
AGCTGAGTAAAGGTGCTGACTCGGGACTTCTGACGGAGCCAGTTATCC  
GAGTGCAACCCCATCTCCCCTCCCATCCAGCATAGACTCTAATTCTA  
GCCCCGAAGAAGCAACGCAGTTCAGCCCATAGTTCCTCAAGCAATACA  
CTTTCAAGATGAATGAGGAGATTCAAGAAGAGCCAGTACTTTCAGAAG  
ATAAAGACTGCAAATCACATTTAGCGGAAGACAGTCAGACTCATTCTG  
CTGATGCTGCTGATGGGTCTGATGGTGACCTGAACAGAGAGACTACTC  
AGCCAGAGACCTGTGATGGCCATGGTTGTGAGACTGTGAGTCTTAGCA  
ACTCAGCCACTCCTGTCTCCCTAGGAGTTCAGAGTCCAGAGCATAAAG  
ATGTCGATAAGCCCCGTCATTGATAAAGACTCACTAGCTACCAAG  
ATACTTGTGAAAATGACCGAGAAGAAAGAGAGTTTGGATCCTTCTGGAG  
TAGAATCTACTCAAGCAGATCTTCCCAATGAAAAGCTTCTCCTTGTCTT  
CTCGTTGTGCGATACCTGAAGGAAAATGAATCAGCTAAAAGAAATAGCCT  
CTCCATCTTCCCCTGTAAGAGTAGAGGTACAGATAACTGACCAGGCTT  
TGGAGAGCATGCCAGAGGACTGTCCCATTCAAGACTCATCTACTACAA  
TGCAAAACAGAGAGGTTTGCCATGGACGTTCCAGTGTCTGAGTTAGCTG  
AGACTGATGAAAATCTGACCCTCAAATCATCAGCCCTTATGAAAATG  
TTCTTCTCATCGTTCTTCTCTGCTGAGCCCAGCAAAAATCCAAACAG  
ATACCTGTATAGCACAGTTGTTTCACTTCACTGAAGTGTATTCTGTCA  
TCATCAGATCCTCTCCTGAGGATGTGGTAGTGACAAAACCTCTAACA  
GAACTGTCTCAGGTGAAGAGTCTCATTGTGAGAGCCACGATCTAGAAA  
CTGAATCCGAGCAAAAAGTGTCTTGTGGGCCGCGCAGTCTGATGCAC  
CTCCCTTGGCCGTAGCACCCACCGCATCAGATGCAGCATCAGTCACTG  
GGGAACAAGCAAGCAAAGTCATCATCACCAAAAACGGATGCTGATGCTG  
ACTCCTGGAGCGAGATCCGTGAAGACGACGACGCTTTCGAAGCTCGGG  
TGAAGGAGGAAGAACAGAAGATATTCGGTTTGGATGGTAGACAGGCAGT

|    |                                    |             |             |        |   |      |                                                                                                                                                                                                                                                                                                                                                                                                                                                                                                                                                                                                                                                                                                                                                                                                                                                                                                                                                                                                                                                                                                                                                                                                                                                                                                                                                                                                                                                                                                                                                                                                                              |
|----|------------------------------------|-------------|-------------|--------|---|------|------------------------------------------------------------------------------------------------------------------------------------------------------------------------------------------------------------------------------------------------------------------------------------------------------------------------------------------------------------------------------------------------------------------------------------------------------------------------------------------------------------------------------------------------------------------------------------------------------------------------------------------------------------------------------------------------------------------------------------------------------------------------------------------------------------------------------------------------------------------------------------------------------------------------------------------------------------------------------------------------------------------------------------------------------------------------------------------------------------------------------------------------------------------------------------------------------------------------------------------------------------------------------------------------------------------------------------------------------------------------------------------------------------------------------------------------------------------------------------------------------------------------------------------------------------------------------------------------------------------------------|
|    |                                    |             |             |        |   |      | CACAGGGCACCCTCCTGATACCACTCCTGCTAGGACCCCAACTGAAG<br>AGGGGACTCCGACAAGTGAACAAAATCCATTCTCTTTTCAGGAAGGAA<br>AACTGTTTGAGATGACCCGAAGTGGTGTATCGATATGACCAAAGGC<br>CCTATGCAGATGAAAGTTTGCACCTTTTCCAAATCGGCCAAGAGTCCA<br>ATGAAGAGGCTATCTCCGAAGACTTGAAGGAAGGGGCCACTGGGGCTG<br>AGCCTCCACAGACGGAGACTACTAGTGAGTGTGCTGGAACCTTTCAGAAC<br>CCAAAGAAGCAATGGATGACGAAGGAGAATTACTTCTGATGATGTAA<br>GTGAGGAGATAGAGGATTTACCTGCCTCGGATGCTAACATTGACTCCC<br>AAGTGATAATTTTCAGCTTCCACAGAAACACCCACCAAAGAGGCTGTAT<br>CCACAGCGGTGAGGAGCCCCCACCACACAGCGGAGTGATTCTCTGA<br>GCACTGTGAAGCAGACACCACGCCCTGCCGTCTTGGACCTGTTGGTC<br>AGTTGGACTTTTCCCCCGTCACTAGGTCTGTTTATTCGGGACAGGATG<br>ATGAGTCCCAGAGTCTTCTCCAGAGGAACAGAAGTCTGTGATTGAGA<br>TCCCTACTGCACCCGTGGACAACGTGCCTTCTGCCGAAAGCAAACCCC<br>AAATTCCTATCAGGACTCTCCCCACTTTAGTCCCAGCCCCCTCCATCTG<br>CAGAGGATGAGAGTGCATTTTCTGATGATTTCCCATCTAGCCTGGATG<br>AGGATAGTAAGGAAGGTGGAGCAAACCAAAGTCCAAAATTCCCGTCA<br>AAGCACCCACCCAAAGAAGTGGAGTGGCAGCCCTCCCCTACCGACATAC<br>CTCTCCAGAAGACAGCTGTCCCCCAGGGACAGGAAACACTAAGCAGAG<br>CACCAGATGGTAGAAGCAAGTCAGAGTCAGACGCTAGTTCCCTTAGATG<br>CTAAGACCAAATGCCAGTGAAAGCCAGAAGTTACATTGAGACAGAGA<br>CGGAGAGCAGGGAGAGGGCCGAGGGGTTTGGAGTCAGAATCAGAAGACG<br>GGGCCACAAAACCAAAGCTCTTTGCATCCCCGACTGCCGGTGAAGAGCA<br>GGAGCACTTCATCTTCCGGCAGGCCAGGCACGAGCCCCACCAGAGAGA<br>GCAGGGAGCACTTCTTTGACCTTTACCGAAACTCCATAGAATTTCTTG<br>AGGAGATTAGTGATGAAGCTTCCAAATTAGTGGACAGGCTTACACAGT<br>CAGAGAGGGAGCAGGAGCCACCTTCAGACGACGAAAGTAGCAGTGCCT<br>TGGAAGTGTGAGTCAATTGAGAGTCTGCCACCTGTTGACATTGAGCACT<br>CAGCTCCCGAGGACATCTTTGACACAAGGCCATTTGGGATGAGTCTA<br>TTGAGACTATGATTGAACGCATCCCTGATGAAAATGGCCATGACCGAG<br>CTGAAG |
| 42 | <a href="#">ENSMUSE00000563439</a> | 126,940,146 | 126,940,072 | 1      | 1 | 75   | ATCCCCAAGATGAGCAGGAGCGGATGGAAGAAAGGCTGGCTTACATCG<br>CTGATCACCTTGGCTTCAGCTGGACAG                                                                                                                                                                                                                                                                                                                                                                                                                                                                                                                                                                                                                                                                                                                                                                                                                                                                                                                                                                                                                                                                                                                                                                                                                                                                                                                                                                                                                                                                                                                                              |
| 43 | <a href="#">ENSMUSE00000563435</a> | 126,937,869 | 126,937,738 | 1      | 1 | 132  | AATTAGCAAGAGAAGTGGATTTTCACTGAGGAGCAAATTCACCAAATTC<br>GAATCGAGAACCCCAACTCCCTTCAAGATCAGAGCCACGCACTGCTCA<br>AGTACTGGCTGGAGAGGGATGGGAAGCATGCCACAG                                                                                                                                                                                                                                                                                                                                                                                                                                                                                                                                                                                                                                                                                                                                                                                                                                                                                                                                                                                                                                                                                                                                                                                                                                                                                                                                                                                                                                                                                |
| 44 | <a href="#">ENSMUSE00000563434</a> | 126,936,763 | 126,936,620 | 1      | 1 | 144  | ATACCATCCTCATCGAATGCCTCACCAAGATCAACAGGATGGACATTG<br>TACATCTCCTGGAGACCAACACAGAGCCCTCCAGGAGCGCATGGGCC<br>GCAGCTATGCAGAAATAGAGCAGACCATTACGCTGGACCACAGTGAAG<br>GATTTTCAGTCCCTTCCAGACGAGCTCTGTGCTGCCAAGGAGAAGAAGG<br>AGCAGGAAGCTTCCAAAGAAAGCGAGTCTAGCACCACCCGCCCATGG<br>TCTCCGAAGAAGACATATCTGTGCGTTATTCCACATTTTCAGGATTGCC<br>TCCCCAAAAGTGAAGGGGACAGCCAGCAGCAGCACTGTCTCTCAA<br>TGCACCAGGAGCCAGTTCAACAAGATTTCTCAGGGAAAACGCAAGACC<br>AGCAGGAATATTA                                                                                                                                                                                                                                                                                                                                                                                                                                                                                                                                                                                                                                                                                                                                                                                                                                                                                                                                                                                                                                                                                                                                                                                   |
| 45 | <a href="#">ENSMUSE00000563431</a> | 126,934,778 | 126,934,526 | 1      | 2 | 253  | TGTAACAACACCAGGGGCAGAAGTGAAGACCCTCAGAAGGCCACAGC<br>CGTTCCCTGACTCTCTCTGTAAGACTCCTGAGGACATCAGTACCCCTCC<br>TGAGGGAAACAAAGCCTTGTCTCCAGACCCCGGTGACTAGCGAACGTGG<br>TTCTCCGATTGTGCAAGAACCTGAGGAGGCTTCCGAGCCAAAGAGGA<br>GAGTTCTCCAAGGAAAAGTGCCTGGTCAATTGTTGAGTCAACAGACGA<br>CCAGTCTCAGGTCTTTGAAAGACTGGATGGTGATGCCGCTTTTCAAAA<br>G                                                                                                                                                                                                                                                                                                                                                                                                                                                                                                                                                                                                                                                                                                                                                                                                                                                                                                                                                                                                                                                                                                                                                                                                                                                                                                    |
| 46 | <a href="#">ENSMUSE00000563429</a> | 126,933,226 | 126,932,938 | 2      | 0 | 289  | GAGCTAACAGAGGAATTAGGAGAGCTGGAGGCTAGCTCTGATGAGGAG<br>GCCATGGTAACCTACCAGGGTTGTCCGCCGAGAGTGATTATCCAG<br>GGAGACGATATGCCTGACATAACCCCAAGAGACGGTCCAGAGGAAGAA<br>TATGTTGATGAGAATGGACACACCGTGGTGAAGAAG                                                                                                                                                                                                                                                                                                                                                                                                                                                                                                                                                                                                                                                                                                                                                                                                                                                                                                                                                                                                                                                                                                                                                                                                                                                                                                                                                                                                                                |
| 47 | <a href="#">ENSMUSE00001260738</a> | 126,930,653 | 126,930,561 | 0      | 0 | 93   | GTTACCCGGAAAATCATTAGGCGGTACGTTTCTCTGATGGCACAGAG<br>AAGGAGGAGGTTACCATGCAGGGAATGCCTCAGGAGCCAGTCAACATT<br>GAGGATGGGGACAATTATTCCAAAGTGATAAAGCGCGTGGTATTGAAG<br>AGTGACACCCAGCAGTCAGAG                                                                                                                                                                                                                                                                                                                                                                                                                                                                                                                                                                                                                                                                                                                                                                                                                                                                                                                                                                                                                                                                                                                                                                                                                                                                                                                                                                                                                                             |
| 48 | <a href="#">ENSMUSE00000563426</a> | 126,930,081 | 126,929,998 | 0      | 0 | 84   | GTGACTTTGTCTGAACCCAGCGTTTTGTCCAGTACCTCACAGTTTCAG<br>GCCGAGCCAGTAGAAGGCCGTAGAGTCAGCAAAGTTGTTAAAACAACC<br>ATGGTACACGGAGAACGGATGGAGAAGAGTCTTGGGGACTCTAGCTTA<br>GCCACTGACCTTCTTCCAGCCAAAGATGACTTTGAAGAG                                                                                                                                                                                                                                                                                                                                                                                                                                                                                                                                                                                                                                                                                                                                                                                                                                                                                                                                                                                                                                                                                                                                                                                                                                                                                                                                                                                                                          |
| 49 | <a href="#">ENSMUSE00001081872</a> | 126,929,886 | 126,929,722 | 0      | 0 | 165  | GCTTTGGGGTACACAGGTAGCCATATGAACGTCCACTTGCCAGTTTA<br>GTAGAGAATGAAATCCTGAAGGAGGATGGATCAATAATTAAGAG                                                                                                                                                                                                                                                                                                                                                                                                                                                                                                                                                                                                                                                                                                                                                                                                                                                                                                                                                                                                                                                                                                                                                                                                                                                                                                                                                                                                                                                                                                                              |
| 50 | <a href="#">ENSMUSE00001077693</a> | 126,928,847 | 126,928,665 | 0      | 0 | 183  | GACAACAATGAGTAAAGCCAGGACACAGAGGAGGGCTGTGGTGAAGGA<br>CCAGCAGGGGAAACACATCACCTTGGAGCACCTGGAGGATGTTCCCGG<br>AGCACTGGACCAAGACGACCTCCAGCGAGATCTCCAGCAACTCCTTCG<br>GCACTTCTGCAAGGAGAACACAAAGCAAGAGGCCAAAATGAGGAGCTGC<br>CCAGTTCTCACCAGAAACCACAAACCCACTCAATATGCAACTTCCCAT<br>TTCTGCGCAGGAGTGAAGTGGCCTAATTACTGGGACCCAGTGAC<br>ACTTCCACTCTCAGCAAACACACAGCATCTACTTTTCTTCTTTCTCC<br>CTGCCCTCTCTAACTATAAGCTAATTTGTGACCAAAGATAGCATCCT<br>TCCTTCCGGATGCTGTATCCACTATTTTGGAGATCCGTGCTAACCTGG<br>GAACTGGCATCTCTATTGTTTGGCTTCTGCTCAAGCTCCATGAAACTCC<br>ATGAATCAGAAGAAGTTCACCTGCAGACTTCTTCAAATGACAGGGGAA<br>TCCTTCCAAGGTATCTATGTATAATGTATATAGCCGAAATTCAGAG<br>CGAACAACAGAGTAAAATTCAAACCACTGCCTGTCAATAATTACTGG<br>GCATCATGGAATAAAAGCCTCTAGATATTGCTGAACAATGGTTAATTA<br>TGATATTGCTAACACAATCAAATGGTAATACAGTTCTATGGAAGAAAC<br>ACTTCAGACTTAGACACGTCCTTAGAACTTCCAGAGTAGCCATTTGCT<br>CTTAAAGCCGTCAGGATCATAATCTTGAAGAAGAATCCCTAGGAGTGG<br>TCTTAGGACTGGTCAGCCATAGCCGTTGGCTCTTGGACTGTGGCCCT<br>GAGGGAGAGGGAGAAGGACTCACAGGCCAGCAGATGGAACAGCGAGG<br>TATTCTGGTGTAGAAAGCTTCCAGGGGTGGTGTCTAGCACCTTCAGGT<br>GTTTTGACTTTGGACACGTTGGCAGGGTATTTAAAAGCTATAACTA<br>CTGTAGTTTTCCGGTGTTCATTGCTGCTTTAGCAAACCACGCTGTCTT<br>ACTGGTGGTACTTTCTTCTGGCCACTGCACTGTAGATAATTCATTGGA<br>AACAAAGATTTATGCACCACACAAAAGGTTAAATGCTGTACCATGTTG                                                                                                                                                                                                                                                                                                                                            |
| 51 | <a href="#">ENSMUSE00001303914</a> | 126,926,894 | 126,926,803 | 0      | 2 | 92   |                                                                                                                                                                                                                                                                                                                                                                                                                                                                                                                                                                                                                                                                                                                                                                                                                                                                                                                                                                                                                                                                                                                                                                                                                                                                                                                                                                                                                                                                                                                                                                                                                              |
| 52 | <a href="#">ENSMUSE00001243556</a> | 126,923,971 | 126,921,606 | 0<br>2 | - | 2366 |                                                                                                                                                                                                                                                                                                                                                                                                                                                                                                                                                                                                                                                                                                                                                                                                                                                                                                                                                                                                                                                                                                                                                                                                                                                                                                                                                                                                                                                                                                                                                                                                                              |



**Supplementary Table 2. The exon nomenclature of *Ank3* used in this study.**

The exon information was collected from a previous study (Rueckert, *et al.*, *Mol Psychiatry* **18**, 922–929, 2013) and the current information in the Ensembl database. The coordinates of each exon in chromosome 10 are shown (GRCm38/mm10). Except for the alternative first exons, all other known alternative exons are highlighted in yellow. Exon 2a is incorporated when exon 1a is used. Exon 45 can exist in the form of exon 45l, exon 45s, or exon 45a + exon 45s. Transcription may stop at either exon 51t or exon 52.

| Exon No. |                                    | Start      | End        | Start Phase | End Phase | Length | Sequence                                                                                                                                                                                                                                                                                                                                                                                                                                                                                                                                                                                                            |
|----------|------------------------------------|------------|------------|-------------|-----------|--------|---------------------------------------------------------------------------------------------------------------------------------------------------------------------------------------------------------------------------------------------------------------------------------------------------------------------------------------------------------------------------------------------------------------------------------------------------------------------------------------------------------------------------------------------------------------------------------------------------------------------|
| 1a       | n/a                                | 69,398,773 | 69,399,129 | -           | 0         | 357    | GTTGTCTGGGGGACCCTGCGGCGGACAGCACTGGGCATGCTCGGGCGGCAG<br>TGGGCCGGGCGGTGCGCGCCTCCACCTGGCTGTCCCGCCCCCGCAAG<br>CCAACCGAGCAGCACCTGGCGGCGCCGGCAGGGGAGGAGAAGGCGCGGG<br>GCGGCGCTGCGCGTTCCCGAGCCGTGGCCCAACTTTCACCCCCACTTTCC<br>TCTGGGGGTGCAGTCCCTGGATCGGGGTTGAGGAGACGCCACTCGAGC<br>GCAGAGCCGAGTTCCTGGAAGGCGGAGCGCGGAGTACCCACCGTATGGCC<br>TGCTCGGGCACCTCGTCCCCAGTGGGCGGGGAGCCCCGATCTTGAGCAG                                                                                                                                                                                                                                    |
| 2a       | n/a                                | 69,484,229 | 69,484,267 | 0           | 0         | 39     | GGTGACTTTGGATCCTGTTATTACGAAGCTCTCAAAG                                                                                                                                                                                                                                                                                                                                                                                                                                                                                                                                                                               |
| 1e       | <a href="#">ENSMUSE00001241754</a> | 69,533,772 | 69,534,284 | -           | 0         | 513    | GTGTGTGTGTGTGCAGCGCACATGCACGTATGCCCTCCCCCTTTCTCTCT<br>CACCATTCCAAGCTAGAATCACCGTGGAGAAGCAAGCCCTGAAATGTTGT<br>CAAGATCTTTCTCGGGGTAACGACTGGCTAAAAAACAATAAAAAAGAGA<br>GAGAAAGGAAGAAAAGAAAAGAAAAGAAAAGAAAAGAAAAGAAAAGAAA<br>TTGGAATATTGATTTTCTTTGGAGGAATAACCAAGGGCTTTGCTGGAGAGA<br>ACCCAGTTCCTCCCTGAGGCGAGCTGAGTTGCCCGTGACAGCAGCCAGG<br>GCTGGCTTGAAGCAGCCGCTCTGCCCTGGGAGTTCCCTAAATGGACTTTGG<br>TCTCAATGCTGTGACTCTTTGCCGTGGTGGATGTGGGAACACGGAAGG<br>TGATCTCCTGCCTCGTCTCAACTCCCCGATCTCAAGGAAAGATGAGTGAA<br>GAGCCAAAGGAGAAGCCCGCAAGCCTGCTCATAGGAAGAGGAAAGGAAAA<br>AAG                                                        |
| 1b       | <a href="#">ENSMUSE00001240581</a> | 69,706,370 | 69,706,925 | -           | 0         | 556    | AGGATTAGTGCTGGCTTCTCGGCTGCCGCATGTGGGGTGAATCCGGATCTT<br>TCTCCTTTACAAGAGCCACCCTTTGCAGCATTTCCCCCTTTGGAGGAACCAC<br>TTAGACACTTCCAGCTAGTGGCAGGGGATGCGGCCATAACACAGCTCCTCC<br>GGTCCCAGCTGCCTCCACTACAGCCTCTGCACCAGGATGGCTGTGCTCTCC<br>TCCAGAGGGGAAGGCTCAGCAAGGTGTAGGATGAGATCTGGCCCCCTGCTGT<br>GGTGGGTTTTGAAAGCTGCAGTTTCCCCAGCATCTCTGCCTCTCTGCCTCT<br>TGGATGCCTTTCTGCTCAGGCTTCTCTCCTGCGAGGGCTATGCTGCTCTAT<br>GCCTGATTAGAGGTACCCAAGGAGATCACCTTTCTCAGAGAAAGCTCTGCG<br>CGCTGCTTGAAGCAGGGTCTTTTTCAAATGCATTATGCTCATGCCGCTC<br>CCAGTTAAAGAAAAACAGGGATTTAGAAATCAATGCGGAAGAAGAGACTGA<br>GAAAAAAGGAAACACCGCAAACGGTCCCGGGATCGCAAGAAAAAG |
| 1f       | <a href="#">ENSMUSE00001263979</a> | 69,785,525 | 69,785,672 | -           | 0         | 148    | AGGAGGTCGGGGAGACGTCTTTACGTTTCCAAGGCGGATATTTTGTAGACA<br>GGATGTTCTGCCCAAGTGTAACTAATTGAGTTATCAGGTTTCGTATTTG<br>GCCTCAGAGAATGGCGTGGAAAGAGCCAGAGGGCTTCCAGAAAGAA                                                                                                                                                                                                                                                                                                                                                                                                                                                          |
| 2        | <a href="#">ENSMUSE00001282033</a> | 69,808,416 | 69,808,517 | 0           | 0         | 102    | TCTGATGCCAACGCAAGTTACTTAAGAGCAGCTCGGGCAGGGCACCTGGAA<br>AAGGCCCTTGACTACATCAAAAATGGAGTGGACGTCAACATCTGTAACCAG                                                                                                                                                                                                                                                                                                                                                                                                                                                                                                          |
| 3        | <a href="#">ENSMUSE00001280093</a> | 69,808,873 | 69,808,971 | 0           | 0         | 99     | AATGGATTGAATGCACCTCCATCTTGGCTTCCAAAGAAGGCCATGTGGAAGTG<br>GTCTCTGAGCTGCTGCAGAGGGAAAGCCAAATGTTGATGCCGCCACAAAG                                                                                                                                                                                                                                                                                                                                                                                                                                                                                                         |
| 4        | <a href="#">ENSMUSE00001274976</a> | 69,809,171 | 69,809,269 | 0           | 0         | 99     | AAAGGAAACACGGCCTTACACATCGCATCTTTGGCTGGGCAAGCGGAAGTG<br>GTCAAGGTCTTGGTTACGAACGGAGCGAATGTCAACGCACAATCTCAG                                                                                                                                                                                                                                                                                                                                                                                                                                                                                                             |
| 5        | <a href="#">ENSMUSE00001241373</a> | 69,815,695 | 69,815,793 | 0           | 0         | 99     | AATGGCTTACACCATTGTATATGGCAGCCAGGAGAACCACCTGGAAGTC<br>GTCAGGTTTCTTCTGGACAATGGCGCCAGCCAAAGCCTGGCCACAGAG                                                                                                                                                                                                                                                                                                                                                                                                                                                                                                               |
| 6        | <a href="#">ENSMUSE00001288955</a> | 69,822,208 | 69,822,393 | 0           | 0         | 186    | GACGGCTTACGCCATTGGCCGTGGCTCTGCAACAAGGTCATGACCAAGTC<br>GTGTCCCTCCTGCTCGAGAACGACACGAAGGAAAAGTGCCTCCAGCC<br>CTCCACATCGCAGCCCGAAAGACGACACCAAGGCAGCAGCTCTGCTCCTG<br>CAGAATGACACAAACCGGACGTTGGAGTCAAAG                                                                                                                                                                                                                                                                                                                                                                                                                    |
| 7        | <a href="#">ENSMUSE00001258555</a> | 69,823,078 | 69,823,101 | 0           | 0         | 24     | ATGGTGGTGAATAGAGCAACTGAG                                                                                                                                                                                                                                                                                                                                                                                                                                                                                                                                                                                            |
| 8        | <a href="#">ENSMUSE00001214460</a> | 69,824,318 | 69,824,416 | 0           | 0         | 99     | AGTGGCTTACCCCGCTCCACATAGCTGCCACTATGGGAACATCAATGTG<br>GCCACGTTGCTGTTAAACCGAGCGGCTGCTGTGGACTTACCAGCACGG                                                                                                                                                                                                                                                                                                                                                                                                                                                                                                               |
| 9        | <a href="#">ENSMUSE00001258730</a> | 69,850,106 | 69,850,204 | 0           | 0         | 99     | AATGACATCACTCCCTTACACGTTGCTTCCAAAGAAGGCCATGTGGAAGTG<br>GTGAAGCTATTGCTGGACCGGGTGCAGAGATCGATGCCAAGACCAGG                                                                                                                                                                                                                                                                                                                                                                                                                                                                                                              |
| 10       | <a href="#">ENSMUSE00001250647</a> | 69,867,385 | 69,867,483 | 0           | 0         | 99     | GACGGTCTGACTCCGTTGCACTGTGGGGCAGAGAAGTGGCCATGAGCAGGTG<br>GTAGAGATGTTGCTTGCAGAGATCCGCCCCATCCTTTCAAACCAAG                                                                                                                                                                                                                                                                                                                                                                                                                                                                                                              |
| 11       | <a href="#">ENSMUSE00001297249</a> | 69,871,002 | 69,871,199 | 0           | 0         | 198    | AATGGATTGTCGCCACTGCACATGGCCACACAAGGAGACCATTTAAACTGC<br>GTCCAACCTCCTCCAGCACAACGTCGCCGTGGACGACGTCACCAACGAC<br>TACCTGACTGCCCTCCATGTGGCTGCCACTGCGGCCATTACAAAGTTGCC<br>AAGTTCTTTTGGATAAGAAAGCTAGCCCCAATGCCAAAGCCCTG                                                                                                                                                                                                                                                                                                                                                                                                      |
| 12       | <a href="#">ENSMUSE00001307807</a> | 69,874,790 | 69,874,888 | 0           | 0         | 99     | AATGGCTTACCCCTCTCCATATCGCTGCAAAAAGAACCAGCATCCGAGTA<br>ATGGAACCTCTTTTGAAGCACGGTGCATCTATTCAAGCCGTAACCGAG                                                                                                                                                                                                                                                                                                                                                                                                                                                                                                              |
| 13       | <a href="#">ENSMUSE00001272604</a> | 69,877,830 | 69,877,928 | 0           | 0         | 99     | TGGGCTTACCCCAATCCATGTTGCTGCCCTTTCATGGGACATGTAAATATC<br>GTGTACAGCTAATGCATCATGGAGCCTCCCAACACCACCAATGTG                                                                                                                                                                                                                                                                                                                                                                                                                                                                                                                |
| 14       | <a href="#">ENSMUSE00001220057</a> | 69,879,893 | 69,879,991 | 0           | 0         | 99     | AGAGGAGAGACGGCATTGCATATGGCGGCTCGGTCCGGAACAAGCAGAAGTG<br>GTGCGGTATCTGGTCCAAGATGGGGCTCAGGTAGAAGCAAAAGCTAAG                                                                                                                                                                                                                                                                                                                                                                                                                                                                                                            |
| 15       | <a href="#">ENSMUSE00001290652</a> | 69,882,361 | 69,882,558 | 0           | 0         | 198    | GATGACCAGACTCCACTCCACATCTCAGCCGACTTGGGAAAGCTGACATA<br>GTGCAACAACCTGTTACAGCAAGGAGCATCCCCCAATGCAGCAACAACCTTCT<br>GGGTACACCCCCCTTACCTTGGCGCCAGAGAGGGGCATGAGGATGTAGCT<br>GCGTTCCTCCTGGATCATGGAGCATCTTTATCCATAACAACAAAG                                                                                                                                                                                                                                                                                                                                                                                                  |
| 16       | <a href="#">ENSMUSE00001248451</a> | 69,884,747 | 69,884,845 | 0           | 0         | 99     | AAGGGATTACCCCTCTGCACGTGGCAGCCAAATACGGAAGCTTGAAGTC<br>GCAAGTCTCCTGCTGCAGAAGAGTGCCTCTCCGATGCCGAGGGGAAG                                                                                                                                                                                                                                                                                                                                                                                                                                                                                                                |
| 17       | <a href="#">ENSMUSE00001279345</a> | 69,885,139 | 69,885,237 | 0           | 0         | 99     | AGCGGGCTAACTCCACTGCATGTAGCAGCGCATTACGATAATCAGAAAGTG<br>GCCCTTCTGCTCTTGGACCAGGGAGCCTCACCCACGCAGCCGCAAG                                                                                                                                                                                                                                                                                                                                                                                                                                                                                                               |
| 18       | <a href="#">ENSMUSE00001278922</a> | 69,892,322 | 69,892,519 | 0           | 0         | 198    | AATGGCTATACACCCTGCACATCGCGGCCAAGAAGAACCAGATGGACATA<br>GCCACGTCCCTGCTGGAGTACGGTGTGATGCAAACGCGGTTACCCGGCAA<br>GGGATTGCGTCCGTCATCTTGGCGCACAGGAAGGGCAGTGGACATGGTG<br>TCGCTGCTCCTGAGTAGAAACCGGAATGTCAACCTGAGCAATAAG                                                                                                                                                                                                                                                                                                                                                                                                      |
| 19       | <a href="#">ENSMUSE00001280782</a> | 69,893,445 | 69,893,543 | 0           | 0         | 99     | AGCGGTCTACCCCACTCCACTGGCTGCTCAAGAAGACCGAGTGAATGTG<br>GCCGAGGTCCTTGTCAACCAGGGGGCCATGTGGATGCTCAGACAAAG                                                                                                                                                                                                                                                                                                                                                                                                                                                                                                                |
| 20       | <a href="#">ENSMUSE00001220119</a> | 69,898,041 | 69,898,139 | 0           | 0         | 99     | ATGGGCTACACCCCGCTCCATGTGGGCTGTCACTATGGAAATATCAAATA<br>GTCAATTTTCTGCTGCAGCATTCTGCAAAAGTTAATGCCAAGACGAAG                                                                                                                                                                                                                                                                                                                                                                                                                                                                                                              |
| 21       | <a href="#">ENSMUSE00001221633</a> | 69,898,228 | 69,898,326 | 0           | 0         | 99     | AATGGATACACAGCACTGCACCAGGCTGCTCAGCAGGGCCACACGCATATC<br>ATCAATGTCTTGTTCAGAAACAACGCTCCCCCAATGAACCTACTGTG                                                                                                                                                                                                                                                                                                                                                                                                                                                                                                              |
| 22       | <a href="#">ENSMUSE00001248586</a> | 69,898,994 | 69,899,089 | 0           | 0         | 96     | AATGGGAACACAGCTCTGGCCATCGCCGGCGCCTTGGTTACATCTCGGTG<br>GTTGACACACTGAAGGTCGTGACGGAGGAAATTATGACCACCACT                                                                                                                                                                                                                                                                                                                                                                                                                                                                                                                 |
| 23       | <a href="#">ENSMUSE00001261484</a> | 69,904,198 | 69,904,270 | 0           | 1         | 73     | ACCATCACGGAGAAGCACAAAATGAATGTCCAGAAACGATGAATGAAGTC<br>CTCGATATGTGACAGCATGAAG                                                                                                                                                                                                                                                                                                                                                                                                                                                                                                                                        |



|     |                                    |            |            |   |   |      |                                                                                                                                                                                                                                                                                                                                                                                                                                                                                                                                                                                                                                                                                                                                                                                                                                                                                                                                                                                                                                                                                                                                                                                                                                                                                                                                             |
|-----|------------------------------------|------------|------------|---|---|------|---------------------------------------------------------------------------------------------------------------------------------------------------------------------------------------------------------------------------------------------------------------------------------------------------------------------------------------------------------------------------------------------------------------------------------------------------------------------------------------------------------------------------------------------------------------------------------------------------------------------------------------------------------------------------------------------------------------------------------------------------------------------------------------------------------------------------------------------------------------------------------------------------------------------------------------------------------------------------------------------------------------------------------------------------------------------------------------------------------------------------------------------------------------------------------------------------------------------------------------------------------------------------------------------------------------------------------------------|
| 24  | <a href="#">ENSMUSE00001217354</a> | 69,904,448 | 69,904,510 | 1 | 1 | 63   | TAAGGAAAGCCAGCGCCCCGAAAAGCTCAGTGATGGGGAATATATCTCAG<br>ACGGTGAAGAAG                                                                                                                                                                                                                                                                                                                                                                                                                                                                                                                                                                                                                                                                                                                                                                                                                                                                                                                                                                                                                                                                                                                                                                                                                                                                          |
| 25  | <a href="#">ENSMUSE00001255465</a> | 69,920,438 | 69,920,491 | 1 | 1 | 54   | GTGATAAATGCACATGGTTCAAAAATTCCCAAAGTACAGGAGGTTTTGGTGA<br>AAA                                                                                                                                                                                                                                                                                                                                                                                                                                                                                                                                                                                                                                                                                                                                                                                                                                                                                                                                                                                                                                                                                                                                                                                                                                                                                 |
| 1s  | <a href="#">ENSMUSE00001275881</a> | 69,925,495 | 69,926,191 | - | 1 | 697  | GAGAACAAAGTTGAAAGTTTGCTGCAGCTCCCGGCCACTCCTGCTCCCGG<br>GCCCTTCTTTGTTTTCTCCCTGGGTTTGTTTTTCTTCTACCTGGCTTGGCT<br>GTTTCTTCATTCACCTTTGAGAAGAGCCCGTCTCCAAATCGCCCAGTTACA<br>CAAGTGCCCGGGGCTCTCTGGACTTGTGAGGGTCCCTGCTACTCTGACTGC<br>CCTGGTATCAAGTTACTGAAAGTCTACACCCAGGCAGTCTCATATTTACA<br>TACAAATAACTCCTGGGTTTGTCTTTATGTCACATTTGGGTCCTGCAAGAG<br>GCTTGCCAGAGCGTCTTAATCCAATCAGGAGGCACTTTGAAAGGATGTCT<br>GTTGAGCGGTGAGAAGGATGTTCTGTCGCTATTAAGTGTGCCACACAAAAT<br>TTTTTCGCATGTTTCGGTCTGAGTTTTTTTTTTTTTTTTTAAATCTTCGGAGTT<br>AAAAAGTGAGGAATGATGTACAGCTGCTCAGTTGCCTTCGACAGCTTGGA<br>GATGCTGAGGGAAACGCTGCAGCCCTGGTGAAGAAGATCTGACTAGGGACG<br>GGTTTGGATCCATAACCAGGCTGGTGTGGATTGGGGCTGGTGTGGACGGCTT<br>ACTCTAAACCCCTGCTTAAGGAATTCCTGGAAGCCTCGGGAAAGTACTCCC<br>CAACCAGTCGTGGTGGAAATGCTTTGCCACACA                                                                                                                                                                                                                                                                                                                                                                                                                                                                                                                                                                |
| 26  | <a href="#">ENSMUSE00001309139</a> | 69,927,695 | 69,927,818 | 1 | 2 | 124  | GTGAAGATGCCATCACAGGGGACACTGACAAGTATCTCGGGCCACAGGACC<br>TTAAGGAGCTAGGTGATGACTCCCTGCCAGCAGAAGTTACGTAGGCTTCA<br>GTCTTGAGGCCGTTCTGCCAG                                                                                                                                                                                                                                                                                                                                                                                                                                                                                                                                                                                                                                                                                                                                                                                                                                                                                                                                                                                                                                                                                                                                                                                                          |
| 27  | <a href="#">ENSMUSE00001230155</a> | 69,929,447 | 69,929,458 | 2 | 2 | 12   | TCCCAAGATAAG                                                                                                                                                                                                                                                                                                                                                                                                                                                                                                                                                                                                                                                                                                                                                                                                                                                                                                                                                                                                                                                                                                                                                                                                                                                                                                                                |
| 28  | <a href="#">ENSMUSE00001286314</a> | 69,932,394 | 69,932,496 | 2 | 0 | 103  | CCTCCGCTCCTTCAGTTCGGATAGGTCCTACACCTTGAACAGAAGCTCCTA<br>CGCAAGGGACAGCATGATGATAGAGGAACCTTCTGGTACCATCCAAAGAGCA<br>G                                                                                                                                                                                                                                                                                                                                                                                                                                                                                                                                                                                                                                                                                                                                                                                                                                                                                                                                                                                                                                                                                                                                                                                                                            |
| 29  | <a href="#">ENSMUSE00001255995</a> | 69,950,952 | 69,951,058 | 0 | 2 | 107  | CACCTGACGTTACAGAGGGAGTTGATTCTGACTCCCTCAGACACTACAGT<br>TGGGCAGCGACACGTTAGATAATGTGAACCTGGTCTCAAGCCCGGTGCAT<br>TCTGG                                                                                                                                                                                                                                                                                                                                                                                                                                                                                                                                                                                                                                                                                                                                                                                                                                                                                                                                                                                                                                                                                                                                                                                                                           |
| 30  | <a href="#">ENSMUSE00001220072</a> | 69,953,440 | 69,953,472 | 2 | 2 | 33   | CTGCTCGTCTCCGCTGCCTCAGTATGACTCAAG                                                                                                                                                                                                                                                                                                                                                                                                                                                                                                                                                                                                                                                                                                                                                                                                                                                                                                                                                                                                                                                                                                                                                                                                                                                                                                           |
| 31  | <a href="#">ENSMUSE00001208972</a> | 69,955,926 | 69,956,150 | 2 | 2 | 225  | GTTTCTGGTTAGCTTTATGGTGGACGCGAGAGGGGGCTCCATGCGAGGAAG<br>CCGCCACCACGGGATGCGGATCATCATCCCTCCGCGAAAGTGTACGGCCCC<br>CACCCGCATCACGTGCCGCTGGTAAAGAGACATAAACTGGCCAACCCACC<br>CCCCATGGTGGAAAGGAGAGGGATTAGCCAGTAGGCTGGTAGAAATGGGTCC<br>TGCGGGGGCACAATTTTAGG                                                                                                                                                                                                                                                                                                                                                                                                                                                                                                                                                                                                                                                                                                                                                                                                                                                                                                                                                                                                                                                                                            |
| 32  | <a href="#">ENSMUSE00001230547</a> | 69,958,918 | 69,959,072 | 2 | 1 | 155  | CCCCGTCATTGTGGAAATCCCTCATTTTGGGTCCATGAGGGGGAAGGAGAG<br>AGAACTTATCGTCTTCCGAGCGAGAACGGAGAGACCTGGAAGGAACATCA<br>GTTTGACAGTAAAAACGAAGACCTCGCGGAGCTTCTCAATGGCATGGATGA<br>AG                                                                                                                                                                                                                                                                                                                                                                                                                                                                                                                                                                                                                                                                                                                                                                                                                                                                                                                                                                                                                                                                                                                                                                      |
| 33  | <a href="#">ENSMUSE00001292195</a> | 69,973,722 | 69,973,933 | 1 | 0 | 212  | AACTCGACAGCCCAGGAAAGAGTTGGGTACAAAGCGCATCTGCAGAATTATCA<br>CAAAGGATTTCCCCAGTATTTTGGCGTGGTTTCCCGGATTAAGCAGGAAA<br>GCAACCAGATCGGTCTGAGGGTGGGATTCCTGAGCAGCACCACCGTGCCCC<br>TCGTCCAGGCCTCCTTCCAGAGGGCGCTTAACCAAGAGGATCCGTGTGG<br>GTCTCCAG                                                                                                                                                                                                                                                                                                                                                                                                                                                                                                                                                                                                                                                                                                                                                                                                                                                                                                                                                                                                                                                                                                         |
| 34  | <a href="#">ENSMUSE00001268073</a> | 69,976,048 | 69,976,255 | 0 | 1 | 208  | GCTCAGCCCGTGCCAGAGGAAACGGTAAAAAAATCCTTGGGAACAAAGCA<br>ACATTTAGCCCAATTGTACAGGTAGAGCCGAGGAGAAGGAAGTTCCATAAG<br>CCGATCACCATGACCATTCGGTGCCTCCCGCTCGGGAGAAGGCGTGTCC<br>AATGGGTACAAGGGGGATGCCACGCCAACCTGCGGCTCCTCTGCAGCATC<br>ACAG                                                                                                                                                                                                                                                                                                                                                                                                                                                                                                                                                                                                                                                                                                                                                                                                                                                                                                                                                                                                                                                                                                                |
| 35  | <a href="#">ENSMUSE00001205997</a> | 69,977,713 | 69,977,809 | 1 | 2 | 97   | GAGGCACCTCACAGCTCAATGGGAAGACATCACAGGAACAACCCCTCTGA<br>CGTTCATAAAGGATTGTGTGTCTTTACAACCAACGTTTCAGCCAG                                                                                                                                                                                                                                                                                                                                                                                                                                                                                                                                                                                                                                                                                                                                                                                                                                                                                                                                                                                                                                                                                                                                                                                                                                         |
| 36  | <a href="#">ENSMUSE00001252247</a> | 69,978,471 | 69,978,699 | 2 | 0 | 229  | ATTCTGGCTGGCGGACTGCCATCAGGTGTTAGAGACCGTAGGGCTAGCCTC<br>CCAGCTGTACAGAGAGCTGATATGCGTTCCTTACATGGCCAAGTTCTGTTGT<br>GTTTGCCAAAACAAACGACCCGGTGGAGTCTCGCTGAGGTGCTTCTGTAT<br>GACAGACGACAGGGTGGACAAAACCTGGAGCAGCAGGAGAAGTTTCAGGGA<br>GGTTGCCAGAAGCAAAGACATTGAG                                                                                                                                                                                                                                                                                                                                                                                                                                                                                                                                                                                                                                                                                                                                                                                                                                                                                                                                                                                                                                                                                       |
| 37  | <a href="#">ENSMUSE00001292473</a> | 69,979,318 | 69,979,443 | 0 | 0 | 126  | GTTCTGGAAGGAAAGCCCATCTACGTTGATTGCTATGGAAACCTGGCCCT<br>CTGACCAAAGGAGGACAGCAGCTTGTFTTTAACTTTTATTCTTTCAAAGAA<br>AACAGACTGCCATTTTCCATCAAG                                                                                                                                                                                                                                                                                                                                                                                                                                                                                                                                                                                                                                                                                                                                                                                                                                                                                                                                                                                                                                                                                                                                                                                                       |
| 38  | <a href="#">ENSMUSE00001279827</a> | 69,980,272 | 69,980,394 | 0 | 0 | 123  | ATCAGAGACACCAGTCAAGAGCCCTGTGGCCGCTGTCTTTCTGAAGGAG<br>CCAAAGACAACAAAGGGATTACCCCAAACAGCTGTTTGCAACTTAAATATT<br>ACTCTGCCGGCACATAAAAAG                                                                                                                                                                                                                                                                                                                                                                                                                                                                                                                                                                                                                                                                                                                                                                                                                                                                                                                                                                                                                                                                                                                                                                                                           |
| 39  | <a href="#">ENSMUSE00001209441</a> | 69,980,824 | 69,980,850 | 0 | 0 | 27   | GAGACAGAGTCAGATCAAGATGATGAG                                                                                                                                                                                                                                                                                                                                                                                                                                                                                                                                                                                                                                                                                                                                                                                                                                                                                                                                                                                                                                                                                                                                                                                                                                                                                                                 |
| 40  | <a href="#">ENSMUSE00001278273</a> | 69,982,116 | 69,982,197 | 0 | 1 | 82   | GCTGAGAAGGCAGACAGACGCCAGAGCTTTGCCTCCCTAGCTTTACGTAAG<br>CGCTACAGCTACTTGACTGAACCCAGCATGA                                                                                                                                                                                                                                                                                                                                                                                                                                                                                                                                                                                                                                                                                                                                                                                                                                                                                                                                                                                                                                                                                                                                                                                                                                                      |
| 40s | <a href="#">ENSMUSE00001236257</a> | 69,982,116 | 69,982,161 | 0 | 1 | 46   | AAACAGTTGAACGGAGTTCAGGAACAGCAAGATCCCTCCCCACCACTTATT<br>CACACAAGCCATTCTTTCTACAAGACCATAACCAGTCCCTGGACCACGGCTC<br>CAATCACAGTGCCCGGGCCGCAAGTCAGGCTCCTTATCCAGCTCTCCCT<br>CTAACACGCGTCAGCTTCTCGTTAAAATCCATATGGTCTGTCTCGAGCGC<br>CTTCTCCGATCAAATCCACGTTAGGCGCCTCAACTACATCTTCAGTCAAAT<br>CCATTAGCGACGTGGCGTCTCCTATTAGATCTTCCGGACAGTTTCTTCGC<br>CAATAAAAACGGTGGTGTGCGCGTCTCCGTACAATCCCCAGGTTGCCTCTG<br>GTACCCCTGGGAGGGTTCCACCATCACAGAGGCCACACCATAAAGGGGC<br>TGGCTCCCAACTCAACTTTCTCCTCTCGAATTTCTCCTGTGACGACCGCAG<br>GGTCTCTGTTGGAGAGGTCCATCACCATGACACCCCTGCCTCCCCCA<br>AATCAAACATCACTATGTATTCTCAAGCTTGCCATTTAAGTCCATTATCA<br>CATCAGCGACACCACTGATCTTCCCTTTAAAGTCAGTGGTGTCTCCGA<br>CCAAGTCTGCAGCTGATGTCTCAACAGCTAAAGCTACGATGGCATCGT<br>CTCTCTCCTCCCCCTTAAAGCAGATGTCCGGACATGCAGAGGTAGCGCTAG<br>TCAATGGGTCTGTTTCTCCTCTGAAGTACCCTTCGTCTTCAGTTTAAATTA<br>ACGGATGCAAAGCCACTGCCACATTACAGGACAAAATTTCTACAGCCACAA<br>ACGCTGTGAGCTCGGTGGTGGAGCGCAGCCTCTGACACGGTGGAGAAAGCGC<br>TCTCTACCACGACAGCCATGCCCTTTTCCCACTCAGGTGCTATGTTTCTG<br>CAGCCCCCTCGGCTTTCCAGTCCCTTAGAATCCCTCTGCAAGTGCAGTGT<br>ACACCTCCCTCGGTCCTCGATAGCTGCTACTACCTCATCTGTAACCTCAT<br>CAATAATCACAGTGCCAGTATACTCGGTAGTCAATGTTTTGCCAGAACCAG<br>CACTGAAGAACTCCAGACTCTAACTCGTTACCAAGTCGGCAGCGGCTT<br>TGCTGTGCGCCATTAACAACTTACTACGGAGACAGCCCTCAGCCCCATT<br>TCAATCGAATTCATCTCCAGTCAAGTCGTCTCTGTTTCTGGCGTCTCCG |
| 41L | n/a                                | 69,986,083 | 69,993,762 | 1 | 1 | 7680 |                                                                                                                                                                                                                                                                                                                                                                                                                                                                                                                                                                                                                                                                                                                                                                                                                                                                                                                                                                                                                                                                                                                                                                                                                                                                                                                                             |
| 41S | <a href="#">ENSMUSE00001253692</a> | 69,986,083 | 69,988,632 | 1 | 1 | 2550 |                                                                                                                                                                                                                                                                                                                                                                                                                                                                                                                                                                                                                                                                                                                                                                                                                                                                                                                                                                                                                                                                                                                                                                                                                                                                                                                                             |

CCCTTAAGCCATCAGTACCATCTTCTTTATCTTCCAGCCAGGAGATCTTAA  
AGGATGTGGCCGAGATGAAGGAAGATCTCATGAGGATGACTGCCATACTGC  
AGACAGACGTGCCTGAGGAGAAGCCATTCCAAACCGACCTCCCCAGAGAAG  
GGAGAATAGACGATGAAGAACCTTTCAAAATCGTTGAGAAAGTGAAGGAAG  
ACTTAGTCAAAGTCAGTGAGATACTCAAAAAGGACGTGTGTGTGCGAGAGCA  
AAGGGCCACCCAAGTCCCCGAAGAGTGACAAAGGACACTCTCCAGAGGATG  
ACTGGACAGAATTTAGTTCTGAGGAAATACGAGAAGCCAGGCAGGCTGCGG  
CCAGTCACGCCCCGTCCCTGCCTGAGAGAGTACACGGGAAGGCCAACCTCA  
CTAGAGTCATAGACTACCTGACCAATGACATCGGGAGCAGCTCACTGACCA  
ACTTAAAGTACAAGTTTGAAGAGGCTAAGAAGGATGGAGAGGAGAGACAGA  
AGAGGATTTTAAAGCCAGCCATGGCCTTGCAAGGAGCATAAACTCAAAATGC  
CGCCGGCCTCCATGAGGCCTTCCACCTCTGAGAAGGAAGTGTGCAAGATGG  
CTGACTCTTTTTTTGGAGCAGATGCCATCCTAGAGTCTCCCGATGACTTTT  
CCCAGCATGACCAAGATAAAAAGTCCCTTGTCTGACAGTGGCTTTGAAACCC  
GCAGTGAGAAAACACCTTCGGCCCCGCAAAGTGCCGAGAGCACAGGCCCTA  
AGCCGTTATTTACGAAGTCCCCATCCCCCTGTCTACACAGAGACAAGAA  
CTGAAGTGGTCCATGTGATCAGGAGCTATGAGCCCTCTTCTGGAGAGATCC  
CCCAGTCCCAGCCAGAGGACCCCGTGTCTCCCAAGCCTTCCCCTACTTTTA  
TGGAGTTGGAACCAAACCCACCACCTCTAGCATCAAGGAAAAAGTAAAAAG  
CATTTTCAGATGAAAGCCAGTAGTGAGGAAGAGGACCACAGTCCGGTTCTAA  
GCAAAGGCATGCGTGTCAAAGAAGAGACTCACATCACCACGACCACCAGGA  
TGGTGTATCACTCCCCTCCTGGTGGCGAGTGCCTCCGAAAGGATTGAGG  
AGACCATGTGAGTCCATGACATCATGAAGGCCTTTCAGTCCGGGCGAGACC  
CTTCCAAAGAGCTGGCAGGGCTGTTTGAACACAAGTCGGCCATGTCTCCAG  
ATGTTGCCAAGTCTGCTGCTGAGACCTCAGCCAGCACGCAGAGAAGGACA  
GCCAAATGAAACCCAAACTGGAGCGCATTATAGAAGTGCACATCGAAAAAG  
GTAACCAAGCCGAACCCACTGAAATCATTATTAGAGAGACCAAAAAGCATC  
CCGAGAAGGAAGTGTCTGTGTATCAGAAAAGCTTATCCCGGGGAAATATTA  
ACTTAAGAGATTTTCTGCCAGAGAAAACACGATGCTTTCCTGCCCCGAGG  
AGCAGGGTCAGCAAGAAGAAGAAGAGCTGGCAGCCGAAGAGTCTTGCCTT  
CTTATCTGGAATCCTCCAGAGTAAACACTCCAGGGTCCCAAGAAGAAGATA  
GCCGCCCTAGTTCCGCACAGCTCCTGTCCGATGACTTTATAAAAACACTGA  
AGCTTTTGGAGTCAGCACTCCGTAGAGTATCATGACGATGATTTGTGACACC  
TAAGAGGGGAGTCTTACAGGTTTGTGCTGAGAAAATGCTTCTCTCAGAAAAGC  
TAGATGTGTCTCACTCTGATACCGAGGAGTCCGGTACAGACCATGCAGGAC  
CCCCTAGCTCAGAGTTACAGGGGTCTGATAAGCGATCCAGAGAAAAGTAG  
CCACTGCCCCCCCAAAGAAATCCTCTCCAAATCTATAAAGATGTATCTG  
AAAATGGGCTAGGGAGAGTGTCTAAAGATGAGCATTTTGAGAAACTGACAG  
TGTTCACACTACTCGGGCAATGTGAGTGGTCCCAAGCATGCCATGTGGATGC  
ATTTGTCTGAGGACAGACTAGACAGAGGTAGAGAGAAGCTGATGTATGAAG  
ATAGGGTGGACAGGACCGTGAAGGAGGCGGAAGAGAAGTTGACTGAAGTGT  
CGCAGTTTTTTCTGTGACAAAACCTGAGAAGCTAAACGATGAACTGCAGTCCC  
CGGAGAAAAGCCACGCCCAAAAACGGCAAGGATTACTCCTCCAGAGTT  
CCACCAGCAGTAGCCCCGAGAAAAGTGTAAACGGAGCTGTTGGCATCCAACG  
ATGAATGGGTTAAGGCCAGGCAGCGTGGCCCGGATGGACAAAGTGTCCCTC  
AGGCTGAGGACAGGAAGGCACCCAGTAGGTCACACAGCCCTGAGAACAGGG  
TCCCTACCCAACAGAGCGAGGATGACCAGCCTCCAGAGGAAGCCAAAAGAA  
CTGTCTGTGCTCAGAGCAGGGGACAAGAAGGACCCAGTCTGGATTTTACAGC  
TCAAACAATCGAAACTCAGTTCCATTAGATTAAAATTCGAACAAGGGGCAC  
GTGCCAAAAGTAAGGATCCACCTCACGAGGAGAAACATCTGGACGGGCCGT  
CCCGAATCCCGGTTAAGAAAACCTCAAGAAACCAAACCTGCCACGCACCCAG  
GTTTTGCTAGAGAAAACAGCAGAAGGCTGTAGATCCCCTAGAGGAAAGAG  
TGCCAGTGCAAATGATGTTACGGTATTCAAAGCCGACCATGCCCAAAGCA  
ATGAGATCGTTACAAGCAAATCTGGCTCCGGCAATGGCAAAAAGCCACAGAA  
CTGAGATGTTAAGTAAGGCAATGCTGACTTCTTTCTGAGCAACAGGTTG  
AAGACTCAGCCTGCCCCATAACATCAGATCTAGAGACCAAGGGACCGTGGG  
ACAGAAAGGTCTTTAGAACATGGGAAAAGTTCTGGGGCAATAACACTAAGG  
CCCAGAAAGAGCAACTCTCCCATGTGCTCGTTCACGATATAAGAGAGAATC  
ACGCTGGTTCGCCCTGACGATAGTGAGAACGGTGACCCAAAGAGTGGATTTA  
TGTATGTGACTGAGAGAGAACAACAAAATGTTAACGAACGGCTCTCTCTCAG  
AAATTAAGGAAATGAGTGTAAAATCTCCCTCCAAGAAAGTGTATACAGGG  
AGTACATTTGTTAAAGACGGGGACCCCTCCAGCAGCGCTCTCAACCATCCCC  
CCAGGAGAAGTGAGAGCTCGCTAGCATCTCACATTTCCATCAGGGTACAG  
ACGAGAGGAGGATGCTGTGCTCAAACATCCCCGATGGGTTTTGTGAGCAGT  
CAACATTTCCAAAACAAGAACTATCCCCAAGAGTGTCCCGGCAAGTATGA  
GCGAAGGGTAGTTGAGAGCCAGCACTTAACTCCGTAGACGATGAAAAAG  
TTACCTATTCGAGATCAGCAAAGTTTCCAAACATCAGAGTTACCTAGCTC  
TTGATGAAACCGAGACCTCTCCACCAAATCTCCCGACTCATTAGAGTTTA  
GCCAGGGAAGGACTCTCCCTCTAGTGATGTGTTTCGACCACGGTTCCGTGG  
ATGGGTTGGAGAAGACAGAGGGGGGAAAGAGATCAAAAACCTTACCTGTCT  
ATGTCAGCTTCTGCAAGTGGGGAACAGTACGAAAAGGAGCTCCAACCCAG  
GAGGTGTA AAAAAGATCATCAGTACAGGAGTGAAGAGGTTGCAAGGACCA  
GGGGGACCTTCTATACAGCTAGACAGCAAAGCAGCCTCCGTCTCCCCAGG  
GCAGTCCAGAAGATGATACTCTAGAGCAAGTGTCTTTCTAGACAGCTCTG  
GGAAGAGCCCTTTGACCCCGGAAACTCCCAGTTTCAAGGAAAGTGTGAGTTACG  
AGTTCACATCTAAGACACCAGACTCACTCATAGCTTTTATAACCAGGACAAC  
CCAGCCCGATTTCCGAGGTTTTCAGAGGAGTCCGAGGAGGAGGAGCCAAAT  
CAGCCCCACTAAGGCAGGTGACCGTGGAGAAGGAAACAGATCGTGACGTGA  
GCAAAGACTCTATCCAAAGACCCAAATGTAACCGAGTTGCCTATATTGAGT  
TTCCCCCTCCTCCCCGCTGGATGCTGACCAGATGGAATCAGATAAGAAAC  
ATCAATATCTCCCCGAAAGGGAGGTTGACATGATGGAGGTGAGCCTTACAGG  
ACGAGTCTGACAAGTACCAGTTGGCCGAGCCAGTCACTCCGAGTGCAACCCC  
CATCACCAGTCCCTCCCGGTGCCGAGGCCAGTCACTCCAGCGATGATGAGT  
CCTTGTACCAACCAGTCCCAGTTAAAAAATACACCTTCAAGTTGAAGGAAG  
TTGACGAAGGGCAGAAAGACACGGCGAAGTCCAAAACCGCCGCCACAAAAG  
CTTCCAACCAGAAAGAGGCAGATGGTAACGGGAGAGAGGGCGAATCTGGCC  
TTGACTCCCCCTCAGAACGAAACAGCTCAAAAATGGAACAATGACCAGTCTG  
TCACAGAGTGTTCATTGCGACACCGGCTGAGTTTTCTCATGACACAGATG  
CCACGGAGATAGACTCTCTGGATGGCTATGACCTACAGGATGAGGATGACG  
GTCTAACAGAGAGCGACTCTAAACTCCCAAGTCAAGCATAGACACCAAGA

|     |                                    |            |            |   |   |      |                                                                                                                                                                                                                                                                                                                                                                                                                                                                                                                                                                                                                                                                                                                                                                                                                                                                                                                                                                                                                                                                                                                                                                                                                                                                                                                                                                                                                                                                                                                                                                                                                                                                                                                                                                                                                                                                                                                                                                                                                                                                                   |
|-----|------------------------------------|------------|------------|---|---|------|-----------------------------------------------------------------------------------------------------------------------------------------------------------------------------------------------------------------------------------------------------------------------------------------------------------------------------------------------------------------------------------------------------------------------------------------------------------------------------------------------------------------------------------------------------------------------------------------------------------------------------------------------------------------------------------------------------------------------------------------------------------------------------------------------------------------------------------------------------------------------------------------------------------------------------------------------------------------------------------------------------------------------------------------------------------------------------------------------------------------------------------------------------------------------------------------------------------------------------------------------------------------------------------------------------------------------------------------------------------------------------------------------------------------------------------------------------------------------------------------------------------------------------------------------------------------------------------------------------------------------------------------------------------------------------------------------------------------------------------------------------------------------------------------------------------------------------------------------------------------------------------------------------------------------------------------------------------------------------------------------------------------------------------------------------------------------------------|
|     |                                    |            |            |   |   |      | AGGATGTTTGGACGGAGGGCATTCTGAAGCCGGCTGACCGCTCTTTTCAGTC<br>AGAGCAAACCTGGAAGTTATTGAGGAGGAGGAGGGGAAAGTGGGGCTGGACG<br>AAGAGAAACCATCACCTTCTAAAAAGCCATCATCCGACAGAACCCAGAGA<br>AGGCCGATCCCAAGTCAGGGGCCAGTTTTTACCCTGGAAGGCAGACACC<br>CGGACAGATCAGTGCTCCCTGATACTTACTTACAGTTACAAAGTTGACGAAG<br>AATTCGCCACTCCTTTTAAAAACAGTGGCGACCAAAGGTCTCGACTTTGACC<br>CTTGGCCCAATAACCGAGGGGACAATGAAGTTTTTGGACGGTAAATCTCGGG<br>AAGATGACACTAAGCCATTTGGTCTGGCGGTGGACGACCGCTCGCCGGCAA<br>CCACCCCTGACACAACGCCAGCCAGAACCAACTGACGAAAGTACCCCAA<br>CTAGTGAGCCTAACCCCTTCCCATTTTCATGAAGGAAAAATGTTTGGAGATGA<br>CTCGCAGTGGTCAATTGACATGAGCAAGAGAGATTTTGTGGAAGAGAGGC<br>TCCAATTTTTCCAGATTGGTGAGCATACTCTGAAGGGAAGTCAGGGGCC<br>AGGGGGAAGGGATATGGTCACTGATACCCACAGCCACAGTCAGGGGACA<br>CCTCGGTAGACACCAATCTAGAGAGAGATGTAGTGGCACCTTCAGTCGACC<br>CCAACCCAGCATCCCGAGCAACGGAGAGTGTGAGGAAGGCACAGCCTGTA<br>GTGGCTCTCTGGAGAAGTCGGCAGCTGCCACTAACACCTCAAAGTTGACC<br>CCAAGTCACGCACGCCTATAAAAAATGGGAATTTCTGCATCTACCATGACCA<br>TGAAGAAAGAAGGCTCTGGAGAAGTGACAGATAAGACAGAGGCTGTGGTGA<br>CCAGTTGTCAGGGGTTAGAAAACGAAATCGTGAAGAGATCTCGAGTGCAC<br>CCAGTAGCCAGGTGGGCATTAGGCCCAAGAGAAACACGATTTTTCAAAAAG<br>ATAACTTTAATAACAACAATAATCTGGATGCTTCCACTATGCAGACAGATA<br>ACAGCACAAGCCACATAGTTCTGACAGGACGCGCTGCATCCACTTGCACCA<br>CAGAGGAAGCTAATCCAGTAAAAGGCTCAGGAAAGAGTCCAGGGACTCAAG<br>GACACTCCAGCAGAGAGTCTCGGAAGGAGCCGATAGGGCTTAGGCGGAAAT<br>CCAAGCTTCTATAAAGGCCACCCGACCAAAGATGTCTTCCCGCAAACC<br>ATAAGGCAGACAGTAAAACAGGTAAACCGAGGCAGGTTGGTCAATATGAGA<br>AACACAAAGCCCTTCTACTTCTTCATGTTTAGATGCCAAGTCCCGAATTC<br>CCGTCAAAAACACACACAGGGAGAACCTAGTTTTCAGTCAGAAAAGCATGCG<br>CCACACAAAAGCGAGGGCAGCCAGAGAGAGGCAAGGCCAAACAGCCTCCAT<br>CCAAGTTGCCAGTAAAGGTAAGATCCACCCGTGTCCACCGTACCACCACCA<br>ACACCTCCACCACCCTACCACCACCACCACCACCCTACCACCCTACCCTACC<br>TTAAAGTTACAGAAAGTCAGCTTAAGGAGGTATGTAAACATCCCATTGAAT<br>ATTTTAAGGGAATTAGTGGCGAGACCCTAAAACCTTGTGGACCGCCTCACTG<br>AAGAAGACAAAAGATGCAATCGGAGTTGTCTGATGAGGAAGAAAGTACCT<br>CAAGGAACACGTCGTTGTCCGAGACTTCCCGGGCGGCCAGCCTTCAGTTA<br>CCACGAAGTCTGCTAGAAATAAGAAAACAGAGGCACCGCCCTTAAAATCAA<br>AGAGAGGAAAGGCCGGCAGTAGGAGACTG |
| 42  | <a href="#">ENSMUSE00001231047</a> | 69,994,372 | 69,994,446 | 1 | 1 | 75   | GTCCGCAGAGTCCTTGTGAGCGGACGGATATCAGGATGGCGATAGTAGCCG<br>ATCACCTGGGACTTAGTTGGACAG                                                                                                                                                                                                                                                                                                                                                                                                                                                                                                                                                                                                                                                                                                                                                                                                                                                                                                                                                                                                                                                                                                                                                                                                                                                                                                                                                                                                                                                                                                                                                                                                                                                                                                                                                                                                                                                                                                                                                                                                   |
| 43  | <a href="#">ENSMUSE00001259541</a> | 69,998,095 | 69,998,226 | 1 | 1 | 132  | AGCTGGCAAGGGAAGTGAATTTTTTTCAGTGGATGAAATCAACCAAATACGTG<br>TGGAATAATCCCAATTCTTTAATTTCTCAGAGCTTCATGTTATTAATAAAGT<br>GGGTGACCAGAGACGGAAAGAATGCCACAA                                                                                                                                                                                                                                                                                                                                                                                                                                                                                                                                                                                                                                                                                                                                                                                                                                                                                                                                                                                                                                                                                                                                                                                                                                                                                                                                                                                                                                                                                                                                                                                                                                                                                                                                                                                                                                                                                                                                   |
| 44  | <a href="#">ENSMUSE00001257460</a> | 69,999,355 | 69,999,498 | 1 | 1 | 144  | CTGATGCCTTAACTTTCGGTCTTAAACGAAGATTAACCGGATAGACATTGTAA<br>CTCTGCTGGAAGGACCAATATTTGATTATGGGAATATTTTCAGGCACCAGAA<br>GCTTTGTCAGATGAAAACAATGTTTTCCATGACCCAGTTGATG<br><a href="#">GTCACCCCTTCCCTTTCAAGTGGAGCTGGAGACCCCATGGGGTTGTACTGCA</a><br><a href="#">CACCACCCCAACCCTTTCCAGCAAGATGACCATTTTAGTGATATCTCTAGCA</a><br><a href="#">TAGAGTCTCCCTTTAGGACCCCCAGTAGACTGAGTGACGGGCTGGTGCCTT</a><br><a href="#">CCCAGGGAAACATAGAGCATCCAACAGGTGGACCTCCAGTGGTAACCGCAG</a><br><a href="#">AGGACACTTCTTTAGAAGACAGCAAAAATGGACGATTTCTGTAAGTGAACAG</a><br><a href="#">ACCCGGCCGACCCACTGGACGTAGATGAGAGCCAGTTGAAGGACCTGTGTC</a><br><a href="#">AGA</a> GCGAGTGTGCTCAGTGCTGGGCGAGTGTGCCCGGGATCCCAAACGACG<br>GTCGGCAGGCAGAGCCACTGAGACCCGAGACTAGAAAAGTAGGCATGAGCT<br>CTGAACAGCAGGAAAAAGGAAAATCTGGTCTGATGAGGAAGTACAGAAAG<br>ACAAGGTCAAATCTCTGTTTGGAGACATTCACCTTGAAGAAGTAGAGGCTG<br>AGGAGATGACAGAAGACCAGGGGCAGGCTATGCTTAAACCGTGTTCAGCGAG<br>CAGAACTGGCAATGTCTTCACTTGCAGTTGGCAGAACGAGACGCAAGTGTG<br>GAAGCCTAGAGTCCCCAGCGCAAGCTCGAAGACTAAGTGGTGGGTTACTGG<br>ACCGTCTGGATGACAG                                                                                                                                                                                                                                                                                                                                                                                                                                                                                                                                                                                                                                                                                                                                                                                                                                                                                                                                                                                                                                   |
| 451 | <a href="#">ENSMUSE00000642788</a> | 70,001,923 | 70,002,601 | 1 | 2 | 679  |                                                                                                                                                                                                                                                                                                                                                                                                                                                                                                                                                                                                                                                                                                                                                                                                                                                                                                                                                                                                                                                                                                                                                                                                                                                                                                                                                                                                                                                                                                                                                                                                                                                                                                                                                                                                                                                                                                                                                                                                                                                                                   |
| 45a | <a href="#">ENSMUSE00001239902</a> | 70,001,923 | 70,002,231 | 1 | 1 | 309  |                                                                                                                                                                                                                                                                                                                                                                                                                                                                                                                                                                                                                                                                                                                                                                                                                                                                                                                                                                                                                                                                                                                                                                                                                                                                                                                                                                                                                                                                                                                                                                                                                                                                                                                                                                                                                                                                                                                                                                                                                                                                                   |
| 45s | <a href="#">ENSMUSE00001282241</a> | 70,002,511 | 70,002,601 | 1 | 2 | 91   |                                                                                                                                                                                                                                                                                                                                                                                                                                                                                                                                                                                                                                                                                                                                                                                                                                                                                                                                                                                                                                                                                                                                                                                                                                                                                                                                                                                                                                                                                                                                                                                                                                                                                                                                                                                                                                                                                                                                                                                                                                                                                   |
| 46  | <a href="#">ENSMUSE00001280544</a> | 70,004,610 | 70,004,991 | 2 | 0 | 382  | CTCTGACCAGGCTCGGGATTCTATTACCTCATACTCAGGGGAGAACCTGG<br>GAAGATCGAAGCAAATGGAAACCACACAGCGGAAGTCATTCCAGAAGCAAAA<br>GGCAAACCCCTACTTCCCGGAATCCCAAACGATATAGGGAAACAGAGCAT<br>CAAGGAGAACCTGAAACCAAAAACACACGGATGTGGTGCCTGAGGAACC<br>AGTGTGCCCCCTCACAGCCTACCAGAAATCTCTGGAAGAAACAGCAAGCT<br>TGTCATAGAAGACGCACCTAAACCCCTGTGTGCCTGTCCGCATGAAAAAGAT<br>GACCAGGACTACGGCTGACGGCAAAAGCCAGGCTCAACCTCCAGGAAGAAGA<br>GGGTCCACCAGGTGAGAGCCTAAG                                                                                                                                                                                                                                                                                                                                                                                                                                                                                                                                                                                                                                                                                                                                                                                                                                                                                                                                                                                                                                                                                                                                                                                                                                                                                                                                                                                                                                                                                                                                                                                                                                                           |
| 47  | <a href="#">ENSMUSE00001243294</a> | 70,006,803 | 70,006,853 | 0 | 0 | 51   | GTCAAAGCCCGGGCGAAGCGTTTACGCGGATGACCGCCTGCTGTTACAAG<br>GACTTGAGAAACAGTGAGAGTGATTCAAGCTCAGAGGAGGAGCAGAGGATC<br>ACTACCCGGGTCTATACGAAGGCGTGTGATTATAAAG                                                                                                                                                                                                                                                                                                                                                                                                                                                                                                                                                                                                                                                                                                                                                                                                                                                                                                                                                                                                                                                                                                                                                                                                                                                                                                                                                                                                                                                                                                                                                                                                                                                                                                                                                                                                                                                                                                                                |
| 48  | <a href="#">ENSMUSE00001310630</a> | 70,008,778 | 70,008,864 | 0 | 0 | 87   | GGGAGGAAGCCAAAAACATCCCTGGTGAATCTGTACAGAAGAGCAATTT<br>ACTGATGAAGAAGGCAACCTCATCACGAGAAAA                                                                                                                                                                                                                                                                                                                                                                                                                                                                                                                                                                                                                                                                                                                                                                                                                                                                                                                                                                                                                                                                                                                                                                                                                                                                                                                                                                                                                                                                                                                                                                                                                                                                                                                                                                                                                                                                                                                                                                                            |
| 49  | <a href="#">ENSMUSE00001226504</a> | 70,013,972 | 70,014,055 | 0 | 0 | 84   | ATCACTCGGAAAGTAATAAGACGGATTGGTCCACAAGAGAGGAAGCAGGAT<br>GACGTG                                                                                                                                                                                                                                                                                                                                                                                                                                                                                                                                                                                                                                                                                                                                                                                                                                                                                                                                                                                                                                                                                                                                                                                                                                                                                                                                                                                                                                                                                                                                                                                                                                                                                                                                                                                                                                                                                                                                                                                                                     |
| 50  | <a href="#">ENSMUSE00001227898</a> | 70,014,190 | 70,014,246 | 0 | 0 | 57   | <a href="#">CAGGGAGAAGGCTATAAGGTGAAGACGAAGAAGGAAATCCGGAACGTGGAG</a><br><a href="#">AAGAAAACCCACTAG</a> TGACAGTGACGTGAGTCCAGTGGGAAGTACTACTTA<br><a href="#">CGTCAGCAGCTAGACTTAAAAATCTTGAGAAATTTCTGGGTTCTCGGAATA</a><br><a href="#">AGTATATTCCTATATTCCTTTCTCCTTCTTCTGAAATCTCACTGGAAG</a><br><a href="#">ATGAAATGAAATAAATCTTGTTTTTTATTTCTTTA</a>                                                                                                                                                                                                                                                                                                                                                                                                                                                                                                                                                                                                                                                                                                                                                                                                                                                                                                                                                                                                                                                                                                                                                                                                                                                                                                                                                                                                                                                                                                                                                                                                                                                                                                                                     |
| 51  | <a href="#">ENSMUSE00001313132</a> | 70,015,568 | 70,015,653 | 0 | - | 86   |                                                                                                                                                                                                                                                                                                                                                                                                                                                                                                                                                                                                                                                                                                                                                                                                                                                                                                                                                                                                                                                                                                                                                                                                                                                                                                                                                                                                                                                                                                                                                                                                                                                                                                                                                                                                                                                                                                                                                                                                                                                                                   |
| 51t | <a href="#">ENSMUSE00001259731</a> | 70,015,571 | 70,015,805 | 0 | - | 235  |                                                                                                                                                                                                                                                                                                                                                                                                                                                                                                                                                                                                                                                                                                                                                                                                                                                                                                                                                                                                                                                                                                                                                                                                                                                                                                                                                                                                                                                                                                                                                                                                                                                                                                                                                                                                                                                                                                                                                                                                                                                                                   |
| 52  | <a href="#">ENSMUSE00000612179</a> | 70,023,832 | 70,027,438 | - | - | 3607 | GACCACTGGTTCATACTGCCAGTATTGAGAAACTCACCAGAGATCAGCAGG<br>AAGAAAAATAGTCACCAAGAGTGGAGTGTGGGTGAGTGTCTCCACCACAC<br>GTCAGTGACACGATTTTTTTTTTTGTAACGCAGAAGGAAAACGAAAATCAC<br>ATTTTTTCTTTTCAATTTAGCATGAGCCGATCTACAAAGCATGGAAACTCACA<br>TTCATTTCCCGGCACTGAAATGCACACTGAGCAAGTGCAGTGTACGACACAG<br>GAAGCCATGTTCTTACAGCCCGGTCTCAAGTAATTTAGTGTCAATTTTCAA<br>GAAGACAGACAAAACAACACCTGTGCCACCCAGGAGGAGGGGCAGCAGAGG<br>ACGGAATGATCAAATCAAGAAGACACACTAAATTTACTAAATTCACAACAG<br>CTCGCCTTATTTTTCTCGGACCCAACTAACGTGTCAGGGTATAAACACTGT<br>TCCTTTCTTTCTTTCTTTCTTTCTTTCTTTTCTTTTCTTTTAAAGAAAAATAAT<br>ATAATAATAATGAAAAAATCAATAGTTTGTCTGTAATAATAACTACTGT                                                                                                                                                                                                                                                                                                                                                                                                                                                                                                                                                                                                                                                                                                                                                                                                                                                                                                                                                                                                                                                                                                                                                                                                                                                                                                                                                                                                                                                      |

---

AAATTCTAACAGAAGAACTACAATAAAGAATTATAAGGCACCCGCCTCAC  
AGAACACAAAGATATCACAAATGCATCCAAGGACAGGCGTCCCAAGTGACT  
TCACCCCTGGACAAGGATGGGGATCCAGCGCTCTCGGGACTCTTTCACTGAC  
TCTTGTATATTAGCAATTATGTTTGTACACGCAAACTGCTAGCTTGATTT  
TAAAAGAAAAAAATGCAAATCTTTAAAAAGGAAAAAAAAAAAAAACCTG  
CTGCAAATTTAAATAATTCCCCAACGAGGAATCTGTAGTTCTGTGAAAA  
AAAATTTTTTTTTCTTCAGAATATTAATATTTTGTATGCATGCATATCACCT  
TATTTTGATTAAATCTTTTCCAATTTTGCAAACACTACAGTCTCCTGCAAC  
ATGGGAGATTTTATCTGTAAACACAAAGCCCTTCATCTAATATTTATTGCT  
ATTGCCAATTTTTCAATGAAATGACCAAAAATGGAAAAAAAAATAACTATA  
CAGTAGTTTGCTTGGGGTGGGGGAGGGGCGCTGTTAGTGCTTACAGGGG  
GGAAATGCTTGCCACTGTAGAAGTGGATGGTGCTCACAAGAGGCCCCAGTC  
GTGGGTATTTAAAAAAATGGACTGACCGGAAATCCGTATCTAGCAGGATCG  
AAGCGCACTGTAAAAAAAGACAAAAAAAGATC  
GCTGTATTGTGTACTGGCTCTGAGATGTAGACCCCTTTAGCAAGCCAATC  
ACTAGTAACCATCCCAGCAGTGCCCCATTAGGTTAGCGGGGCTGCCGCGT  
TTTATAGAGCATTTTTCTTTGGGTTTGGTGAGGTTCCCTTACTTACTATCT  
TAACCTGAAATCGACCTCCACGGACACCTAGCTCTAAATGACATGTATGAG  
AAAAGCAGACGCCGATAAGCTAGTCGATTATTTAAGCATATAAAATAAAC  
TGTGTTCAACTCTTCACCTACTTGGGTTCCACAGTGTCTTGTATCCTCTG  
GCAAAACCTAGCTGTCTAATCCCCAGTCACAGGGGCCCTGTCTGTGCCTCC  
AGTCACTAAAGCCATACTCTGGAACGTTCTGCTCTCTCCCGAAAAACCCCA  
CCTTGCCATAAACTCTGTGCACTTTGTGGGGGAGCTAAGAATTTAAAGATGA  
AGTAATCTTCGTCTATTTAGGCTCTTCTGCCCATAGAAGAAGATGGGATT  
TATAAGGCCAGTGTGTCAAGAAGTTATGCTGTTCCAGGGAGCATCTATCT  
GTGGTTGATTTTTTTTTTTTTTTTACCCCCAGGAAGCATTGGTTTAGGT  
TTTGTGTCATTAGTTTGCAGGCTTGGAGATTTTGTTCATCACTGTTCTTGAG  
ACAAGGTCTCAAAATGTCTGCTTAGTTTCTTAAGTATGTTGTGTCAGAGC  
TTACAGATTGAGAAATTTGCTAATAACTCGAGATTTTTTTATTTTACCAG  
TTTATTTTGGTACTGGTCATCATGCATGCTAAAAGATGTGAACTACCACTA  
AGCAGCACCCCTCGGCCTTCCCTGGATATTTCTGAGACGGCCTCACTACTG  
GTCCAAGCTGGCCTTGAATTTCCGAGGCTTCTGCCCTGTTTACTTAAGAGG  
GCTGCGCCACCAGACTGAACAGGGGTTCTCTTGTGAAGTAACTCCGGCAA  
CAGCAGACCCGCACTCCAAAAGACGTTGTAGGTGTGACCCCTACTCTCTC  
CAGCTACATTTGTGATCCCCGTATCTTAGCCTTATTTCTACCTAACCCCT  
GAGAGGCACTTGGAGTTTGGGGCCCACTGATTTTATAACTCAAAGAGTTCA  
AAGATCTCATGCCTTTGATTCAACTTTTACCCCGGCCACAGCCAGGCATG  
GCACATTAGGGGTGGTATCTCTCACCATCCTAAACTTCAAGTCCACACTAT  
AACATTTTTCTTCTAAATACATTCCATTGACTCGGTCCTTACCACCA  
CTGTGTGAGTTAGATACTATCTTTGATGTAACAGGCCCATATAGTATTA  
TGAATGCTTAATGTCAATCAAGGCTGTTATTGCCTGTCTATGGGATGAAT  
ATTCCTCAGAATTCAGCCAGAAGACAAGTACCAGAGAGCCTATTTGGTCT  
AGAGAAGCCGCTTTCAATAAAACAAAGAGGCAGAGAGTACATTTGCATGTCA  
TTTGCATGATGTCTGTGTCTACACCCCAACCCCTGCCAATCAGAAACATC  
TAAACGACAAGCTGCCACACCTGAAAGTTTTTTTTAAAGTCCCAAAGCTT  
CTACATAACTAATAACAGAATATAAGAATGTTAACATCTCATTTAAGAGCT  
ATGAATTCAGACCCTCTGGCGTTGCTAGAGATTATTCAGATTTAGAACT  
TAATGGGGTTATGTTACATGCCTGGAAATGTGACTTCAGGAACAGGTTGAG  
AGGTTGAGATGACACCAAAGCCATGAGTTGACCCAGAAGTCTCTGAAGTAC  
GATAGATTTTATTTACGCTCTAACTTCTGTATATACTGCACCGAAATGGG  
ACATAATGTTTGTATTTCCCTGTGCTCAGCTCACTTAAATGTATTAAGATTTT  
CTTTGACATTTTTGTAAAGAGAGAGAGAGAGAGAGAAAGAAAGAAAGAACT  
GTGACTGATAAAATCCTGAGATTTGCCACTTCTCCTTTATACATTTTACC  
CATTTGTTAACATGAAAGGGTTGTTTCTAGAAGGGACTCTCTTCACTGGCC  
ACTCAAGCAACAGAGCTGGCTCTCTCACACTGGTATCCAGCATCCACCA  
TGTTCTTCTTAGCCGTACCTTGGGGCTCCATACAATGGAAGTTTCTCTCC  
ATGGTTAATAAACGTCGATGGAAAAGTGGTTTGTGACTTTCTTCAAAGC  
CTCCCGCTCACATTTGACCGTGAGGAGCCAGAAAGAAGCCACAGGAACAG  
CAACTATAGAATTCGTGCCTCATCCAGGGGCATCTGGGTATTTGTTGGCC  
AGGCAACTGGCATATTTAAAGGTGTATCATTTCTCTAA

---
